1                    **In-utero exposure to PM<sub>2.5</sub> and adverse birth outcomes in India:**  
2                    **Geostatistical modelling using remote sensing and demographic health survey data**  
3                    **2019-21**

4  
5 Arup Jana<sup>1</sup>, Malay Pramanik<sup>2</sup>, Arabinda Maiti<sup>3</sup> and Aparajita Chattopadhyay<sup>4</sup>, Mary Abed Al  
6 Ahad<sup>5\*</sup>

7  
8  
9  
10 \*Corresponding author

11  
12  
13 **LIST OF AUTHORS: NAME, AFFILIATION & ADDRESS**

- 14 1. Research Associate, Indian Institute of Technology Delhi, Hauz Khas, New Delhi - 110 016, India  
15 2. Urban Innovation and Sustainability, School of Environment, Resources and Development (SERD), Asian  
16 Institute of Technology (AIT), P.O. Box 4, Klong Luang, Pathumthani 12120, Thailand  
17 3. Postdoctoral Fellow, School of Geography, Newman Building, University College Dublin, Belfield,  
18 Dublin 4, Ireland  
19 4. Department of population & Development, International Institute for Population Sciences, Mumbai, 40088,  
20 India.  
21 5. Associate Lecturer, School of Geography and Sustainable Development, University of St Andrews, Irvine  
22 Building, KY16 9AL, St Andrews, Scotland, United Kingdom. Email: [maaal@st-andrews.ac.uk](mailto:maaal@st-andrews.ac.uk)

23  
24  
25 **The authors declare that they have no conflict of interest.**  
26

27  
28  
29

Graphical abstract:

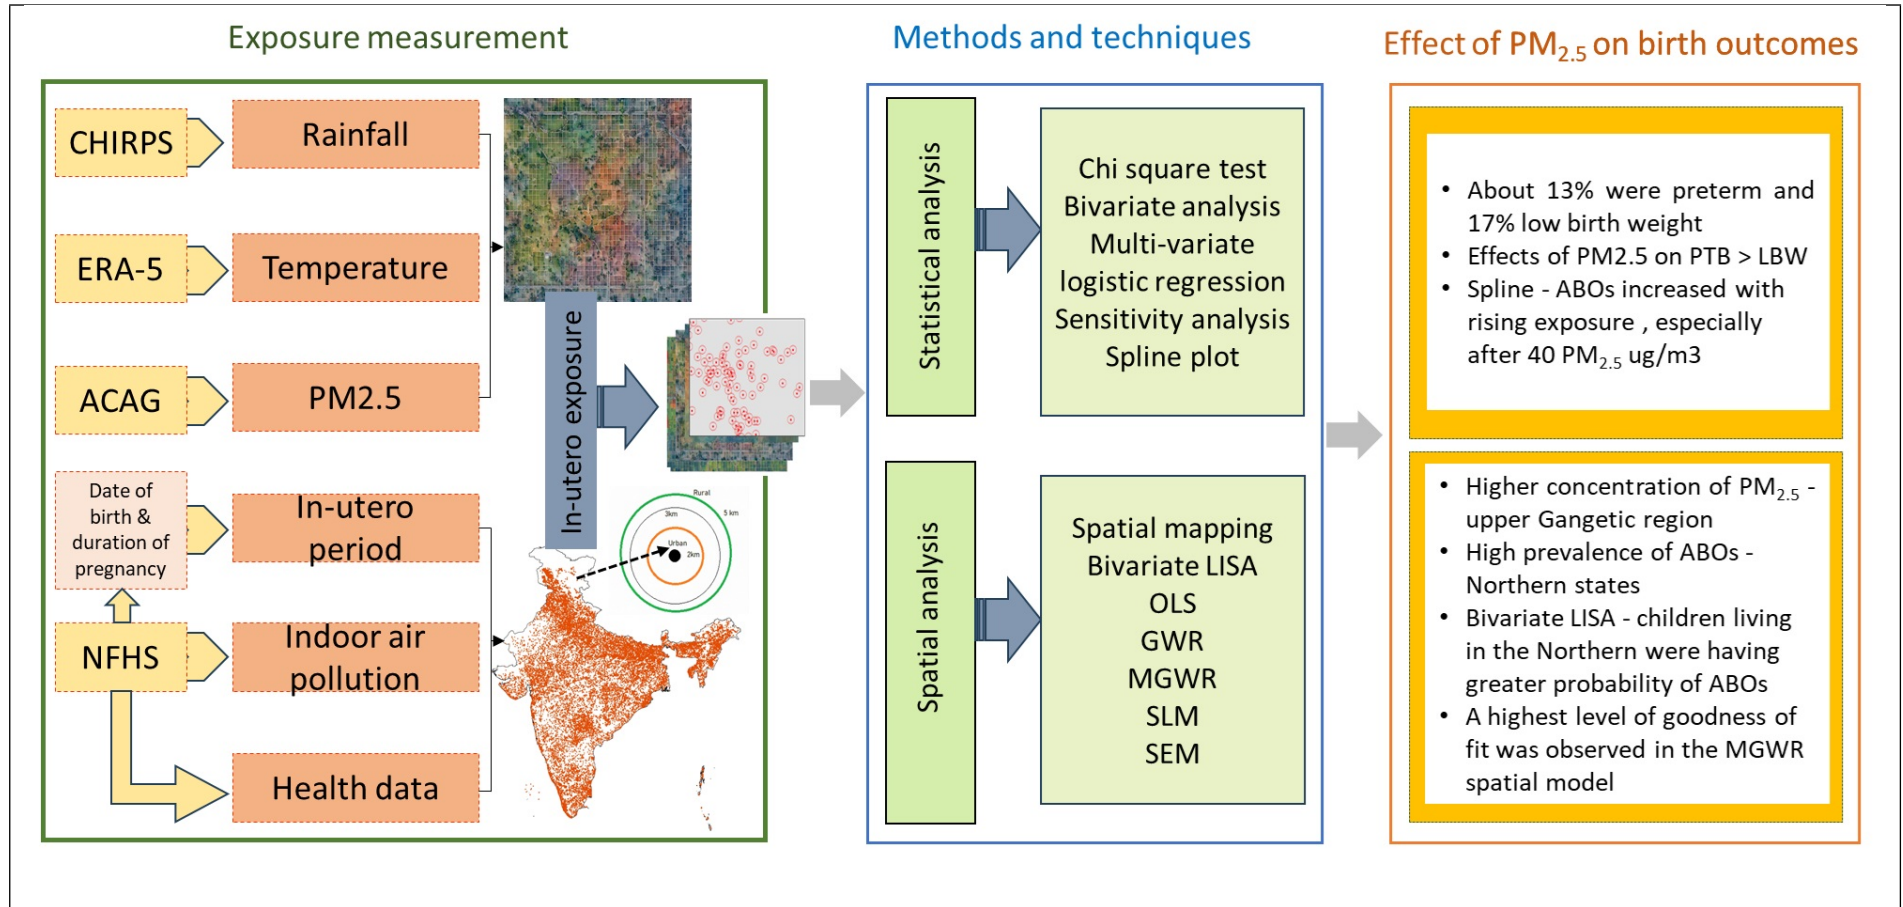

30

31  
32  
33  
34  
35  
36  
37  
38  
39  
40  
41  
42  
43  
44  
45  
46  
47  
48  
49  
50  
51  
52  
53  
54  
55  
56  
57  
58  
59  
60  
61  
62  
63  
64  
65  
66  
67  
68  
69  
70  
71

## **In-utero exposure to PM<sub>2.5</sub> and adverse birth outcomes in India: Geostatistical modelling using remote sensing and demographic health survey data 2019-21**

### **Abstract:**

Rapid urbanization in India is contributing to heightened poor air quality. Yet research on the impact of poor air on adverse birth outcomes (ABOs) especially in the public health aspect is less in India. This study investigates the influence of air quality on birth weight (LBW) and preterm birth (PTB). Utilizing data from the National Family Health Survey and satellite images, the study employs various statistical analyses and spatial models to elucidate the connection between in-utero exposure to air pollution and birth outcomes, both at the individual and district levels. It was observed that approximately 13% of children were born prematurely, and 17% were born with low birth weight. Increased ambient PM<sub>2.5</sub> concentrations during pregnancy were associated with higher odds of LBW (AOR: 1.4; 95% CI: 1.29–1.45). Mothers exposed to PM<sub>2.5</sub> during pregnancy had a heightened likelihood of delivering prematurely (AOR: 1.7; 95% CI: 1.57–1.77) in comparison to unexposed mothers. Climatic factors such as rainfall and temperature had a greater association with ABOs. Children residing in the Northern districts of India appeared to be more susceptible to the adverse effects of ambient air pollution. Furthermore, indoor air pollution was found to be associated with LBW. Employing a distributed spline approach, the study identified a discernible upward trend in the risk of adverse birth outcomes as the level of exposure increased, particularly following an exposure level of 40 PM<sub>2.5</sub> ug/m<sup>3</sup>. Among the spatial models employed, the MGWR spatial model exhibited the highest level of goodness of fit. In addition to addressing immediate determinants such as nutrition and maternal healthcare, it is imperative to collaboratively address distal factors encompassing both indoor and outdoor pollution to attain lasting enhancements in child health.

**Keywords:** Air pollution; low birth weight; NFHS data; PM<sub>2.5</sub> risk; preterm birth, spatial modeling.

### **Highlights:**

- An estimated 13% of the children were preterm and 17% were low birth weight in India in 2019-21.
- High PM<sub>2.5</sub> concentration during pregnancy was associated with LBW and PTB.
- Children residing in the Northern districts of India were found to be more vulnerable to poor air quality.
- A rising trend in the risk of adverse birth outcomes was observed after exposure level of 40 PM<sub>2.5</sub> ug/m<sup>3</sup>.
- The MGWR spatial model demonstrated the highest level of goodness of fit.

## 72 1. Introduction

73 Ambient air pollution poses an existential global environmental threat to planetary and human health, with a  
74 disproportionate burden of its detrimental effects falling on those residing in low and middle-income countries <sup>1</sup>.  
75 Consequently, the United Nations Climate Change Conference has urged developed countries to provide  
76 financial support to less developed and developing countries to confront the adverse impacts of air pollution and  
77 establish appropriate mechanisms to mitigate climate change <sup>2</sup>. Besides being a significant driver of climate  
78 change, air pollution is the most critical risk factor for adverse health consequences <sup>3</sup>. Referred to as the "silent  
79 killer," ambient air pollution is among the top five risk factors for mortality in both males and females <sup>4-6</sup>. In  
80 2019 alone, ambient particulate matter pollution was responsible for 118 million disability-adjusted life years  
81 (DALY) and 4.14 million deaths in 2019 <sup>7</sup>. Among air pollutants, ambient fine particulate matter (PM<sub>2.5</sub>) is  
82 considered the most harmful air pollutant [4, 8–10]. These particles primarily originate from the burning of  
83 fossil fuels and biomass <sup>11</sup>. With a diameter of less than 2.5 microns, exposure to these particles increases the  
84 risk of respiratory diseases, lung cancer, stroke, and heart disease <sup>9,12-16</sup>.

85  
86 In the 2023 World Air Quality Report, India was ranked as the third most polluted country out of 134 nations  
87 based on its average yearly PM<sub>2.5</sub> levels <sup>17</sup>. Notably, about 7 out of 10 Indians are exposed to air pollution  
88 levels that exceed the national standard of 40 µg/m<sup>3</sup> <sup>18</sup>. Alarming, in 2019, as many as 0.98 million deaths in  
89 India were attributed to ambient particulate matter pollution <sup>19</sup>. The key factors of this alarming trend are  
90 primarily attributed to the rising air pollution levels in the country due to urbanization and industrialization  
91 <sup>1,20,21</sup>. To address this critical air pollution situation, the government of India introduced the National Clean Air  
92 Program in 2019, setting a targeted reduction in air pollution. It envisages reaching a minimum 20% reduction  
93 in particulate matter concentration by 2024, compared to 2014 levels <sup>22,23</sup>. However, despite these significant  
94 efforts, India still ranks as the second most polluted country in the world <sup>22</sup>.

95 While air pollution has adverse impacts on the health of individuals across all age groups, infants and children  
96 are considered more vulnerable due to their developing organs and higher air intake per unit of body weight <sup>24,25</sup>.  
97 Ambient air pollution has been associated with a range of pediatric morbidities, including adverse birth  
98 outcomes (ABO), asthma, cancer, and an increased risk of chronic diseases in life stages <sup>9,13,26-30</sup>. Among the  
99 ABOs associated with ambient air pollution are preterm birth (PTB) and low birth weight (LBW) <sup>25,27,31,32</sup>. PTB  
100 and LBW are important predictors of under-five mortality and malnutrition <sup>33,34</sup>. The World Health Organization  
101 estimates that approximately 15 million babies are born preterm (<37 weeks) each year <sup>34</sup>. Furthermore, 15% of  
102 babies worldwide are born with LBW, defined as <2500 grams at birth <sup>35</sup>. While LBW is a global public health  
103 concern, its prevalence is particularly higher in low and middle-income countries <sup>36</sup>.

104 A systematic review of 41 studies found that exposure to PM<sub>2.5</sub> is associated with PTB, LBW, and small-for-  
105 gestational-age births <sup>37</sup>. A prospective cohort study conducted in Tamil Nadu provided the first quantitative  
106 evidence linking rural-urban PM<sub>2.5</sub> exposures during pregnancy of LBW <sup>38</sup>. This study concluded that increased  
107 exposure to particulate matter exposure during pregnancy is associated with a decrease in birth weight among  
108 newborns <sup>39</sup>. However, research in developing countries, albeit limited, established that maternal exposure to  
109 ambient air pollution is associated with higher odds of LBW and PTB among children <sup>40-43</sup>.

110  
111 The majority of studies investigating the association between ambient air pollution with ABOs have primarily  
112 been conducted in high-income countries <sup>36,40</sup>. The evidence regarding this particular issue is somewhat less in  
113 developing countries <sup>32</sup>. According to National Family Health Survey-5, 18% of children born in the five years

114 preceding the survey had low birth weight. India has been identified as a significant contributor to global  
115 preterm births<sup>44</sup>. Moreover, ambient air pollution levels are expected to increase in India as the country is  
116 transitioning from a rural economy to an urban one, with the urban population projected to reach 53% by 2050  
117 from 35.87 in 2022<sup>45</sup>. Despite the alarming rise in air pollution levels in India, there has been a paucity of  
118 research exploring its impact on ABOs. Moreover, the findings of a spatial analysis on the effects of air  
119 pollution on adverse birth outcomes (ABOs) will be helpful for implementing area-specific schemes for  
120 policymakers or stakeholders, which has not yet been done at the national level in India. Therefore, the study  
121 hypothesizes a negative impact of PM<sub>2.5</sub> on birth outcomes in India. In order to address this research gap in the  
122 available evidence, the present study endeavors to investigate the impact of ambient air pollution on ABOs,  
123 particularly focusing on LBW and PTB at the national level. Further, the study utilized different geospatial  
124 models to highlight the vulnerable areas that need to be focused on, with robust estimated outcomes controlling  
125 for environmental, demographic, and socioeconomic confounding factors. The study utilizes nationally  
126 representative data from the latest round of the NFHS, 2019-21, thus ensuring the generalizability of results<sup>46</sup>.  
127 The results of this study might be imperative as LBW and PTB continue to be significant public health concerns  
128 in India. Moreover, this study will augment the existing but limited literature focused on investigating the  
129 association of ambient air pollution with LBW and PTBs, a question of paramount public health significance.

130

## 131 **2.Data and Methods**

### 132 *2.1. Population and health data*

133 Population data were extracted from the fifth NFHS, conducted across 36 states and union territories at the  
134 national level. A stratified two-stage sampling procedure was employed in the survey design. Primary Sampling  
135 Units (PSUs) were villages in rural areas and census enumeration blocks (CEBs) in urban areas. Survey  
136 questionnaires were prepared to take out detailed information on maternal and child health, as well as  
137 socioeconomic data. Additionally, the NFHS data incorporated the collection of biomarker data<sup>46</sup>. The survey  
138 encompassed reproductive history, including data on contraceptive use, pregnancy, birth, termination, and  
139 abortion. Children born 0 to 5 years preceding the survey were considered in the research. The protocol for the  
140 NFHS-5 survey, including the content of all the survey questionnaires, received approval from both the  
141 International Institute of Population Sciences (IIPS) institutional review board and the ICF institutional review  
142 board. Furthermore, it underwent review protocol by the U.S. Centres for Disease Control and Prevention  
143 (CDC). Further details on the sampling design can be obtained in the Indian National Report  
144 (<https://dhsprogram.com/pubs/>).

### 145 *2.2. Air pollution data*

146 In this study, global level PM<sub>2.5</sub> data was derived from the Atmospheric Composition Analysis Group (ACAG),  
147 to measure the exposure of mothers during the pregnancy period<sup>47</sup>. The spatial resolution of PM<sub>2.5</sub> was  
148 0.01° × 0.01° and Resolution-Tiered Approach (RTA) was employed to estimate the concentration of PM<sub>2.5</sub>. The  
149 data is prepared by the fusion of multiple sensors including Aerosol Optical Depth (AOD) measurements from  
150 NASA's Moderate-Resolution Imaging Spectro-radiometers (MODIS), Multi-Resolution Imaging Spectro-  
151 Radiometers (MISR), and Sea-viewing Wide Field-of-View Sensor (SeaWiFS) instruments with the Goddard

152 Earth Observing System (GEOS) and chemical transport model (Chem) data. The data was further calibrated to  
153 match global ground-based observations using a Geographically Weighted Regression (GWR) technique, and  
154 its accuracy has been validated in several previous studies<sup>43,48–55</sup>. Each survey participant was assigned an  
155 average in-utero air pollution exposure based on the child's date of birth and the duration of pregnancy, as  
156 recorded in the NFHS survey data. For instance, if a child was born in January 2019 with a pregnancy duration  
157 of 9 months, the in-utero exposure period was considered from May 2018 to the end of January 2019. The  
158 cluster points were randomly displaced by 2 and 5 km in urban and rural areas, respectively, to maintain the  
159 privacy of participants. Thus, a 3 km buffer was created around each cluster point for the extraction of pollutant  
160 data.

### 161 *2.3 Climate data*

162 We used the Climate Hazards Group InfraRed Precipitation with Station (CHIRPS) precipitation dataset,  
163 covering a span of 43 years from 1981 to the present<sup>56</sup>, with a spatial resolution of 5 km  
164 (<https://www.chc.ucsb.edu/data/chirps>). This high-quality dataset served as the foundation for developing a  
165 comprehensive and robust climatic index, laying the groundwork for deeper insights into the long-term trends  
166 and patterns of climatic hazards in various geographical areas.

167 We also utilized the ERA5-Land product, distributed by the Copernicus Climate Change Service (C3S) Climate  
168 Data Store (CDS) of ECMWF, to analyze land surface temperature (LST) in our study<sup>57</sup>. This dataset provides  
169 monthly temperature values at a spatial resolution of 0.1 degrees (approximately 11,200 meters at the equator)  
170 on a latitude/longitude Climate Modelling Grid (CMG), covering the period from January 1981 onwards. The  
171 ERA5-Land product, along with its fine resolution and long-term availability, enables detailed assessments of  
172 LST variations and their implications for various ecosystems and human activities<sup>56,58–60</sup>.

### 173 *2.4 Variable description*

#### 174 *2.4.1. Dependent variables*

175 According to the World Health Organization (WHO), Preterm birth is defined as a live birth before 37  
176 completed weeks of gestation, while low birth weight is defined as weight at birth less than 2500 grams<sup>61</sup>. In  
177 the present study, we followed the methodology outlined by Jana, Banerjee, and Khan (2023)<sup>62</sup>, to measure  
178 preterm birth using the calendar method of the Demographic and Health Surveys (DHS). The NFHS collected  
179 data on birth weight using the following questions: Was (name of the child) weighed at birth? How much did  
180 (name of the child) weigh? The information was reported in two ways; first, the mother recalled about her  
181 baby's weight, and second, reported with the help of any card of their baby's weight<sup>46</sup>. The other outcome  
182 variable in this study was preterm birth, which is estimated based on the duration of pregnancy. Both outcome  
183 variables are dichotomous, with '0' signifying that the child did not have LBW/was not preterm, and '1'  
184 indicating that the child had LBW/was preterm.

#### 185 *2.4.2. Model covariates*

186 We selected the factors associated with adverse birth outcomes based on published literature and the availability  
187 of variables within the dataset. The study included the child's characteristics, such as the sex of the child (male



188 and female) and birth order (1<sup>st</sup>, 2<sup>nd</sup> and 3<sup>rd</sup> & above), which were considered as confounding factors. Babies  
189 born at home was defined as non-institutional delivery and delivery taken place at any medical institution was  
190 considered as institutional delivery. Mother's general health plays a pivotal role in determining the health of  
191 newborns<sup>63,64</sup>. NFHS-5 collected anthropometric measurements using biomarkers. These measurements were  
192 used to calculate Body Mass Index (BMI) by dividing weight in kilograms by height in meters squared (kg/m<sup>2</sup>).  
193 BMI was categorized into four groups; thin (BMI <18.5), normal (BMI 18.5–24.9), overweight (BMI 25–30),  
194 and obese (BMI ≥30.0).

195

196 The model incorporated several maternal variables, such as mother's level of education (categorized as  
197 illiterate/primary, secondary, and higher education) and mother's age at the time of childbirth (< 20, 20 – 24, 25-  
198 29, and 30 years & above). In the survey, respondents were asked about their primary cooking fuel source. We  
199 classified wood, coal, dung cake, and crop residue as solid or unclean fuel and natural gas, liquefied petroleum  
200 gas, and electricity as clean fuels. The household's wealth quintile was categorized into three categories; 'poor',  
201 'middle' and 'rich'. Additionally, the household's religion was recoded as 'Hindu', 'Muslim' and 'Others' (such as  
202 Sikh, Christian, Jain etc.).

### 203 2.5. Statistical analysis

204 The weighted prevalence of LBW and PTB was estimated using the exposed sample, and the Chi-square test  
205 ( $\chi^2$ ) was performed to evaluate the association between dependent and independent variables. Geospatial  
206 analysis has been conducted using ArcGIS (version 10.8) to prepare the prevalence maps. Further, multivariate  
207 logistic regression was employed to examine the association between exposure to PM<sub>2.5</sub> during pregnancy and  
208 birth outcomes after controlling all the possible confounding factors. The logistic regression model is defined as,

$$209 \quad \text{logit}(p) = \log\left(\frac{p}{1-p}\right) = \beta_0 + \beta_1 * x_1 + \dots + \beta_k * x_k + \varepsilon$$

210 Where,  $\beta_0$  is intercept and  $\beta_1 \dots \beta_k$  are regression coefficients indicating the relative effect of a particular  
211 explanatory variable on the outcome, while  $\varepsilon$  is an error term. Further, bivariate Local Indicators of Spatial  
212 Association (LISA) was used in the study to explore the spatial association between exposure to PM<sub>2.5</sub> and  
213 adverse birth outcomes. A sensitivity analysis was employed by adjusting different determinants to explore the  
214 relation between in-utero exposure to PM<sub>2.5</sub> and birth outcomes such as PTB and LBW. Further, in the study, a  
215 spline function was utilized to visually depict the connection. This connection involved the likelihood of  
216 occurrences such as having children with LBW and PTB, all influenced by exposure to air pollution during  
217 pregnancy. A spline function integrates several polynomial sections linked by knots, forming a continuous  
218 curve. The quantity of knots can be modified to control the curve and smoothness, increasing or decreasing it as  
219 needed. To determine knot placement, we employed quantiles of the exposure level of PM<sub>2.5</sub> in the individuals.

220

221 Bivariate LISA measures the local correlation between a variable and the weighted average of another variable  
222 in the neighborhood.

223

$$I_i = n_i \sum_j w_{ij} z_j$$

224 Where,  $Z_i$  denotes standardized variable of interest and  $W_{ij}$  is weight matrix. The bivariate LISA functionality  
225 the cluster maps of the association between two variables. The cluster map is a special choropleth map showing  
226 those locations with a significant local Moran statistic classified by the type of spatial correlation: bright red for  
227 high-high associations, bright blue for low-low, light blue for low-high and light red for high-low. The high-  
228 high and low-low suggest clustering of similar values, whereas high-low and low-high locations indicate spatial  
229 outliers. The scatter plot of the dependent and independent variables of a spatial unit shows the statistical figure  
230 of the association.

231

232 Several geostatistical models were used in this study to identify the best-fitting model, and the results will be  
233 helpful for policymakers to launch area-specific schemes for vulnerable regions. . . First, Ordinary Least  
234 Squares (OLS) technique was used. This is a classic linear regression model that seeks to find the best-fitting  
235 line through the data by minimizing the sum of squared differences between observed and predicted values.  
236 OLS assumes that the relationship between the dependent and independent variables is constant across space.  
237 Second, we employed Geographically Weighted Regression (GWR) which is a spatial regression technique that  
238 allows for the exploration of spatially varying relationships between variables. It recognizes that the  
239 relationships may change across different geographic locations, providing a localized understanding of the data.  
240 Finally, Multiscale Geographically Weighted Regression (MGWR) which extends GWR by considering  
241 relationships at multiple spatial scales was applied<sup>65</sup>. This model accounts for varying relationships not only at  
242 the local level but also extends its analysis across different geographic scales, providing a more comprehensive  
243 analysis of spatial variability. The model employs two spatial regression models, namely the Spatial Lag Model  
244 (SLM) and the Spatial Error Model (SEM), each addressing distinct aspects of spatial dependency. The Spatial  
245 Lag Model (SLM) is a type of spatial autoregressive model that considers the spatial dependency of  
246 observations. It assumes that the values of the dependent variable are influenced by the values of neighboring  
247 observations, incorporating spatial relationships into the model<sup>66</sup>. It accounts for the spatial interdependence of  
248 data points. On the other hand, the Spatial Error Model (SEM) is another spatial regression model that accounts  
249 for spatial autocorrelation in the error terms of the model. It assumes the presence of spatially correlated errors  
250 that are not captured by the independent variables, allowing for a more accurate representation of the data's  
251 spatial structure.

252

### 253 3. Results

#### 254 3.1 Characteristics of the sample

255 **Table 1** represents the percentage distribution of the sample size used in the present study. Approximately 52%  
256 of the sample consisted of female children, and the rest of the sample was male children. Among the sample,  
257 13% of the sample were born preterm, whereas 17% of the sample were LBW. About half of the sample  
258 belonged to 2<sup>nd</sup> birth order category. One out of 10 mothers were teenagers (under 20 years of age). About 14%  
259 of the children were born at home, and nearly 19% of the mothers were undernutrition or categorized as 'thin'.  
260 Half of the sample belonged to households classified as 'poor', and 73% of the sample belonged to the Hindu  
261 religion. Additionally, 58% of the households reported using solid fuels for cooking.

262

#### 263 3.2 Spatial distribution of ABO and $PM_{2.5}$

264 The spatial distribution of ambient  $PM_{2.5}$  shows a high concentration over the upper Gangetic region (**Figure 1**),  
265 covering states like Uttar Pradesh, Bihar, Delhi, Punjab and Haryana, whereas a lower concentration was



266 observed in the Southern and North-Eastern regions of India. The highest prevalence of preterm was observed in  
267 the Northern states, such as Himachal Pradesh (39%), Uttarakhand (27%) and Rajasthan (18%), and Delhi  
268 (17%), including North-Eastern states like Nagaland (**Table S1**). In contrast, a lower prevalence of PTB was  
269 observed in Mizoram, Manipur and Tripura. As for LBW, the highest prevalence was in Punjab (22%), followed  
270 by Delhi, Dadra and Nagar Haveli, Madhya Pradesh, Haryana and Uttar Pradesh. Conversely, fewer children  
271 with LBW were observed in the North-East region of India (**Figures 1b and 1c**).

272

### 273 *3.3 Effects of PM<sub>2.5</sub> on ABO at the individual level*

274 **Figure 2** shows the weighted percentage of LBW and PTB by selected background characteristics. The  
275 observation revealed that the prevalence of LBW was higher among females (20%) compared to males (17%),  
276 whereas a significant difference was not observed for PTB (**Table S2**). In both cases, the proportion was higher  
277 among teenage mothers. However, a decreasing percentage was found with age for LBW, but an increasing  
278 level of PTB can be observed after age 30 years. The percentage of adverse birth outcomes was greater among  
279 children born at home and residing in rural areas. Underweighted mothers had more LBW (22%) and PTB  
280 (13%) children than normal mothers, 17% and 12%, respectively. Illiterate and primary educated mothers were  
281 having more LBW and PTB children. A similar result can be observed for wealth status. Poor mothers had more  
282 adverse birth outcomes. However, mothers who belonged to the Muslim religion had a lower percentage of  
283 LBW and a higher proportion of PTB. Households using solid fuels for cooking had more adverse birth  
284 outcomes.

285 Our unadjusted and adjusted multivariate logistic regression models consistently revealed associations between  
286 air pollution during pregnancy and birth outcomes, as shown in **Table 2**. Higher ambient PM<sub>2.5</sub> concentrations  
287 during pregnancy were associated with higher odds of both low birth weight (LBW) (AOR: 1.37; 95% CI: 1.29–  
288 1.45) and preterm birth (PTB) (AOR: 1.67; 95% CI: 1.57–1.77). The odds ratios were higher in the unadjusted  
289 models for both LBW (OR: 1.56; 95% CI: 1.50–1.63) and PTB (OR: 1.62; 95% CI: 1.55–1.69). A slight  
290 increase in temperature was associated with higher odds of LBW (AOR: 1.03; 95% CI: 1.01–1.04), though it  
291 was not significantly associated with PTB, while higher rainfall was significantly associated with both LBW  
292 (AOR: 1.07; 95% CI: 1.03–1.12) and PTB (AOR: 1.04; 95% CI: 1.02–1.10). The use of solid fuel for cooking  
293 was associated with higher odds of LBW (AOR: 1.04; 95% CI: 1.01–1.07), but it was not significantly  
294 associated with PTB. Female children had higher odds of being born with LBW (AOR: 1.18; 95% CI: 1.15–  
295 1.20) compared to male children but had slightly lower odds of PTB (AOR: 0.97; 95% CI: 0.95–1.00). Higher  
296 birth order was associated with lower odds of LBW (AOR for second birth: 0.89; 95% CI: 0.86–0.91; AOR for  
297 third or higher birth: 0.84; 95% CI: 0.80–0.88). For PTB, only a third or higher birth order showed a significant  
298 decrease in odds (AOR: 0.94; 95% CI: 0.89–0.98). Teenage mothers (below 20 years) had higher odds of giving  
299 birth to children with LBW (AOR: 1.09; 95% CI: 1.04–1.15) and PTB (AOR: 1.08; 95% CI: 1.02–1.14).  
300 Children born at home had higher odds of LBW (AOR: 1.11; 95% CI: 1.06–1.16). Urban residence was  
301 associated with higher odds of LBW (AOR: 1.07; 95% CI: 1.04–1.11) and lower odds of PTB (AOR: 0.96; 95%  
302 CI: 0.92–0.99). Underweight mothers had higher odds of both LBW (AOR: 1.27; 95% CI: 1.24–1.31) and PTB  
303 (AOR: 1.04; 95% CI: 1.01–1.08), while overweight or obese mothers had lower odds of both LBW (AOR: 0.93;  
304 95% CI: 0.90–0.96) and PTB (AOR: 0.95; 95% CI: 0.92–0.99). Lower maternal education levels were  
305 associated with higher odds of LBW (AOR for illiterate/primary: 1.40; 95% CI: 1.34–1.46; AOR for secondary:  
306 1.23; 95% CI: 1.18–1.28), while higher education was associated with lower odds of PTB (AOR: 0.95; 95% CI:

307 0.91–0.99). Poor mothers had higher odds of LBW (AOR: 1.09; 95% CI: 1.05–1.13) and lower odds of PTB  
308 (AOR: 0.92; 95% CI: 0.88–0.95). Muslim mothers had lower odds of LBW (AOR: 0.87; 95% CI: 0.84–0.91)  
309 and similar odds of PTB compared to Hindu mothers.

310 There was a high likelihood of LBW in women who experienced high levels of PM<sub>2.5</sub> during their gestational  
311 period (**Figure 3 a and 2b**). Employing a distributed spline approach, the study identified a growing trend in the  
312 risk of delivering LBW babies as the exposure level increased, especially after the exposure level of 40 PM<sub>2.5</sub>  
313 ug/m<sup>3</sup>. Concerning PTB, the odds displayed a rapid and exponential increase in relation to the PM<sub>2.5</sub> exposures  
314 and the increasing trend became notably rapid after reaching the exposure level of 50 PM<sub>2.5</sub> ug/m<sup>3</sup>.

### 315 316 *3.4 Sensitivity analysis*

317 The unadjusted odds ratio demonstrates a significantly higher likelihood of LBW associated with PM<sub>2.5</sub>  
318 exposures during pregnancy (OR: 1.56; 95% CI: 1.50–1.63). However, the strength of this association decreased  
319 after adjusting for environmental, socioeconomic, maternal, and child characteristics (**Table 3**). In contrast, for  
320 PTB, the odds ratio shifted from 1.62 in the unadjusted model to 1.67 after accounting for these determinants.  
321 This discrepancy underscores the influence of the various determinants considered in the study on the odds ratio  
322 values, highlighting their importance in the analysis.

### 323 *3.5 Spatial association between PM<sub>2.5</sub> and ABO*

324 The findings of the bivariate LISA map showed that children living in the Northern districts of India faced a  
325 higher vulnerability to ambient air pollution as the high-high clusters of spatial association were found in  
326 Punjab, Delhi, Madhya Pradesh, Rajasthan and some parts of Uttar Pradesh (**Figure 4**). A total of 109 districts  
327 had a significant association between in-utero exposure to PM<sub>2.5</sub> and LBW. On the other hand, 40 districts had  
328 high-high clusters of autocorrelations between PM<sub>2.5</sub> and PTB. Notably, it was observed that most of the  
329 districts of Uttar Pradesh were found to be more vulnerable to PM<sub>2.5</sub> in the context of preterm birth.

330 Additionally, the study employed OLS, GWR, MGWR, SLM, and SEM, to investigate the spatial relationship  
331 between PM<sub>2.5</sub> exposures during pregnancy and the occurrences of LBW and PTB, while considering potential  
332 confounding factors. In line with our hypothesis, the analysis revealed a robust spatial association between  
333 PM<sub>2.5</sub> exposures and LBW, although the strength of this association varied across the different models. Notably,  
334 the GWR model showed the highest impact of PM<sub>2.5</sub> exposures ( $\beta=0.122$ , SE=0.009), while MGWR  
335 demonstrated the highest goodness-of-fit ( $R^2 = 68\%$ ) (**Table 4**). Regarding PTB, the MGWR model provided  
336 the best explanatory power, accounting for 54% of the variance, surpassing other models. In the GWR model, a  
337 noteworthy finding was that a one-unit increase in PM<sub>2.5</sub> exposure corresponded to a 5% increase in the  
338 prevalence of PTB (**Table 5**) and a 12% increase in LBW. Overall, a reduction in the prevalence of LBW and  
339 PTB was observed across all models, with MGWR and GWR models showing particularly promising outcomes.  
340 Nevertheless, higher prevalence rates persisted in Northern India and certain parts of the eastern region, most  
341 notably in Odisha (**Figure 5**).

342

#### 343 4. Discussion

344 The study is the first attempt to measure preterm birth at the Indian district level by exploring the calendar data  
345 of NFHS <sup>62</sup>. The analysis establishes the evidence of the association between in-utero exposure to PM<sub>2.5</sub> and  
346 adverse birth outcomes by leveraging satellite data and large-scale survey data. The individual-level analysis  
347 reveals that an increase in ambient PM<sub>2.5</sub> is associated with a greater likelihood of LBW and PTB, consistent  
348 with previous studies <sup>36,67–69</sup>. We observe a higher value of the odds ratio of having preterm infants whose  
349 mothers were exposed to PM<sub>2.5</sub> during pregnancy as compared to the results for LBW. A significant role of  
350 indoor air pollution has been observed in the study for LBW. Further, climatic factors such as rainfall and  
351 temperature are significantly associated with ABOs in India. To the best of our knowledge, this study is the first  
352 of its kind to understand the association between in-utero exposure to PM<sub>2.5</sub> and adverse birth outcomes in India.

353 It is worth noting that except for Nagaland, North-Eastern states had a lower prevalence of preterm birth and  
354 low birth weight, coinciding with lower pollution levels in that region. Previous studies have found that the  
355 concentration of ambient PM<sub>2.5</sub> is highest in the states of upper-Gangetic plains such as Delhi, Punjab, Haryana,  
356 Uttar Pradesh and Bihar, as observed in the present study <sup>70–73</sup>. A recent Lancet study suggests that the average  
357 PM<sub>2.5</sub> concentrations in Delhi were 13.8 times higher than that in Kerala <sup>74</sup>. The Northern states had the highest  
358 PM<sub>2.5</sub> concentrations. The NFHS-5 report suggests that a large proportion of households in the Northern parts of  
359 India use solid fuels compared to other regions <sup>46</sup>. It is well documented that the residential sector is a  
360 significant contributor to the total PM<sub>2.5</sub> emissions along with the industry, energy and agriculture sectors <sup>75</sup>.  
361 Among industrial, residential and energy sources, the contribution of energy sources to total emissions is the  
362 maximum, while residential sources contribute the maximum to PM<sub>2.5</sub> emissions during winter and post-  
363 monsoon <sup>75</sup>. In contrast, certain studies conducted on future emissions scenarios in India forecast an increase in  
364 PM<sub>2.5</sub> levels <sup>76</sup>. However, at the urban or city level, where most households are already using cleaner fuel,  
365 reducing vehicular emissions (both exhaust and non-exhaust) emerges as a crucial strategy for reducing PM<sub>2.5</sub>  
366 levels. It was prominently observed during the coronavirus pandemic (COVID-19) lockdown in Indian cities  
367 when traffic reduction substantially minimized urban areas' exposure to air pollutants <sup>70,77</sup>. Moreover, the issue  
368 of air pollution is exacerbated by crop residue burning and forest fires in northern India, significantly  
369 contributing to the toxic air quality in the region <sup>78,79</sup>. The higher prevalence of low birth weight and preterm  
370 birth in the districts of the Northern region indicates a spatial association between PM<sub>2.5</sub> and birth outcomes. In  
371 line with our hypothesis, the study finds an individual level and spatial association between in-utero exposure to  
372 PM<sub>2.5</sub> and LBW and PTB.

373 The mechanisms behind preterm birth due to exposure to PM<sub>2.5</sub> are not clearly understood. Some  
374 epidemiological and toxicological studies proposed different pathways to explain the paradox. Due to the finer  
375 size of PM<sub>2.5</sub>, inhaling particulate matter deposits in the lungs and affects the circulatory system <sup>80</sup>. Which is a  
376 reason of having oxidative stress, blood coagulation and placental inflammation that restricts the fetal growth <sup>81–</sup>  
377 <sup>85</sup>. Nevertheless, the presence of particulate matter in the human body disturbs oxygen transport and causes  
378 hormone dysfunction, which is the reason for placental insufficiency <sup>86–89</sup>.

379 An earlier study identified that maternal exposure to PM<sub>2.5</sub> in the latter stages of pregnancy induces cytokine  
380 activation, favouring inflammation <sup>90</sup>. Sometimes inhaled PM<sub>2.5</sub> penetrates the toxic gases that damage  
381 deoxyribonucleic acid (DNA), restricting nutrient supply to the fetus resulting in pregnancy complications

382 during the last trimester of pregnancy that triggers the possibility of having a preterm birth <sup>91,92</sup>. Moreover,  
383 substantial exposure to a large amount of PM<sub>2.5</sub> has been linked to fetal malformation, miscarriage and stillbirth,  
384 all of which can influence subsequent birth outcomes <sup>93–95</sup>.

385 Medical studies found that the mother's fetus grows rapidly in the third trimester of pregnancy <sup>96,97</sup>. That period  
386 is more sensitive, and exposure to PM<sub>2.5</sub> can hemorrhage the foetal growth easily <sup>98,99</sup>. Nevertheless, the level of  
387 thyroid hormone might be affected by the toxicity of PM<sub>2.5</sub>, which is a responsible factor for less fetus weight  
388 <sup>100</sup>. Previous studies have found that fetal growth depends on many factors, such as mothers' health,  
389 socioeconomic condition and genetic factors <sup>101,102,102,103</sup>. Thus, the present study has adjusted for those potential  
390 plausible factors. Nevertheless, the study establishes a significant association between PM<sub>2.5</sub> and LBW. Further  
391 investigation is required to explore the biological mechanism by considering the biomarker measurement of the  
392 fetus.

393 Low birth weight and preterm birth significantly contribute to the highest number of stunting and premature  
394 deaths in India <sup>104–106</sup>. Since 1970, the Indian government has been trying to improve child health by adopting  
395 several schemes that promote the utilization of maternal healthcare facilities, spread awareness of reproductive  
396 health, supply nutrients to mothers and newborns, etc. Adverse birth outcomes not only impact a child's health  
397 but also reduce the productivity of the human resources of a country.

398 Understanding the impact of exposure to indoor air pollution during pregnancy is also important because  
399 pregnant women tend to spend most of their time indoors and this time only increases once the pregnancy  
400 progresses. Past studies found that releasing pollutants from uncleaned biomass burning in the household  
401 restricts fetal growth, increasing the probability of having a child with low weight and preterm birth <sup>107,108</sup>. In  
402 line with the hypothesis, our study also found a negative association between in-utero exposure to PM<sub>2.5</sub> and  
403 birth weight, whereas the result for PTB was the opposite. As PTB mostly depends on the mother's health and  
404 obstetric factors <sup>62</sup>, which could explain the absence of a discernible effect of PM<sub>2.5</sub> on PTB in the study.  
405 However, addressing indoor air pollution through interventions such as promoting cleaner fuels and improving  
406 home ventilation is crucial for improving pregnancy outcomes and neonatal health.

407 The present finds a significant role of climatic factors for ABOs. Previous evidence suggests that high  
408 temperatures can cause heat stress, dehydration, and reduced uteroplacental blood flow, impairing fetal growth  
409 and increasing the risk of LBW <sup>109</sup>. Additionally, heat-induced oxidative stress and inflammation can disrupt  
410 placental function, while cardiovascular strain and hormonal imbalances can further complicate pregnancy  
411 outcomes. On the other hand, extreme rainfall can heighten the risk of waterborne and vector-borne diseases,  
412 leading to maternal infections that adversely affect fetal development (Poursafa et al., 2015). Flooding can also  
413 result in nutritional deficiencies, physical and psychological stress, and disrupted healthcare access, all of which  
414 contribute to LBW and PTB <sup>110,111</sup>. Improved healthcare access, infrastructure development, and policies  
415 addressing climate change are essential to protect maternal and neonatal health against these challenges.

416 Our findings suggest that both indoor and ambient air pollution along with climatic factor are significantly  
417 associated with ABOs. However, to gain a deeper understanding of the biological mechanisms underpinning the  
418 relationship between air pollution and malnutrition, which cannot be fully explored using existing datasets,  
419 conducting an in-depth epidemiological study is imperative. It is important to note that our research assumes

420 that mothers did not change their residence during the period from pregnancy to the conducting date of the  
421 survey. The study acknowledges that like some other possible determinants, smoking practices and alcohol  
422 consumption were not considered in the model due to the under-reporting nature. Also, the possibility of biases  
423 due to self-reporting cannot be ignored. Due to the cross-sectional nature of the study, we cannot draw a causal  
424 relationship, other aspects including the seasonality effects can be explored using the longitudinal study in the  
425 future. As India is not satisfactorily progressing in child nutrition, hence concerted effort to improve  
426 environmental conditions, especially air quality, is essential to tackle issues related to child health.

## 427 **5. Conclusion**

428 The present study provides robust evidence linking in-utero exposure to ambient PM<sub>2.5</sub> and climatic factors,  
429 such as temperature and rainfall, with adverse birth outcomes in India. The geostatistical analysis underscores  
430 the need for targeted interventions, particularly in Northern districts identified as highly vulnerable. To address  
431 these challenges, comprehensive strategies are essential. The National Clean Air Program should be intensified,  
432 with stricter emission standards and enhanced air quality monitoring. Integrating air quality data with health  
433 surveillance systems will enable precise identification of at-risk populations. Additionally, policies promoting  
434 clean cooking fuels and energy-efficient technologies can reduce indoor air pollution. Climate adaptation  
435 strategies, such as developing heat action plans and improving water management, should be incorporated into  
436 public health planning to mitigate the effects of extreme temperatures and irregular rainfall. Public health  
437 initiatives must raise awareness about the risks of air pollution and climate change, particularly among pregnant  
438 women.

439

440

441

442

443

444

445

446

447

448

449

450

451 **Statements & Declarations**

452

453 **Funding**

454 No financial assistance has been granted from any survey organization, institutional open access or any other  
455 alternative sources to carry out the research.

456

457 **Data Availability**

458 The study uses secondary data that are available on reasonable request through  
459 [https://dhsprogram.com/data/dataset\\_admin/](https://dhsprogram.com/data/dataset_admin/)

460

461

462 **Ethics approval**

463 The Indian Demographic and Health Survey (DHS) is known as National Family Health Survey (NFHS) in India.  
464 We used published large scale national data where every respondent was anonymized in the data set itself. As it  
465 is not based on a primary survey- cases, we need not to do any anonymization in the study as the data is already  
466 made in that fashion following all ethical protocols. Thereby, it is certified that all applicable institutional and  
467 governmental regulations concerning the ethical use of human volunteers were followed during the course of the  
468 survey.

469

470 **Consent to participate**

471 Verbal as well as written informed consent was obtained from all the participants. The informed consent was  
472 taken from their parent or legal guardian who were not mature or below 18 aged. Then blood sample was taken  
473 from the finger and collected in microcuvette. The data is in the public domain- free of cost for users and funded  
474 by the government. More details on that available at  
475 <https://dhsprogram.com/search/index.cfm?bydoctype=publication&bypubtype=5>.

476

477

478 **Consent to publish**

479 The dataset is publicly available, thus consent for publication is not applicable for the study.

480

481

482

483

484

485

486

487

488



## 489 References

- 490 1. Monteiro A, Sá E, Fernandes A, et al. How healthy will be the air quality in 2050? *Air Qual Atmos*  
491 *Health*. 2018;11(3):353-362. doi:10.1007/s11869-017-0466-z
- 492 2. UN. COP26: Together for our planet. Published online 2021. Accessed October 13, 2022.  
493 <https://www.un.org/en/climatechange/cop26>
- 494 3. Jana A, Varghese JS, Naik G. Household air pollution and cognitive health among Indian older adults:  
495 Evidence from LASI. *Environ Res*. 2022;214(Pt 1):113880. doi:10.1016/j.envres.2022.113880
- 496 4. Murray CJL, Aravkin AY, Zheng P, et al. Global burden of 87 risk factors in 204 countries and territories,  
497 1990–2019: a systematic analysis for the Global Burden of Disease Study 2019. *The Lancet*.  
498 2020;396(10258):1223-1249. doi:10.1016/S0140-6736(20)30752-2
- 499 5. World Bank, Evaluation I for HM and. *The Cost of Air Pollution: Strengthening the Economic Case for*  
500 *Action*. World Bank; 2016. doi:10.1596/25013
- 501 6. Korhonen A, Lehtomäki H, Rumrich I, et al. Influence of spatial resolution on population PM2.5 exposure  
502 and health impacts. *Air Qual Atmos Health*. 2019;12(6):705-718. doi:10.1007/s11869-019-00690-z
- 503 7. IHME. GBD 2019 Cause and Risk Summary: Ambient particulate matter pollution. Published online  
504 2020.
- 505 8. Bachwenkizi J, Liu C, Meng X, et al. Fine particulate matter constituents and infant mortality in Africa: A  
506 multicountry study. *Environment International*. 2021;156:106739. doi:10.1016/j.envint.2021.106739
- 507 9. Usmani RSA, Saeed A, Abdullahi AM, Pillai TR, Jhanjhi NZ, Hashem IAT. Air pollution and its health  
508 impacts in Malaysia: a review. *Air Qual Atmos Health*. 2020;13(9):1093-1118. doi:10.1007/s11869-020-  
509 00867-x
- 510 10. Fann N, Risley D. The public health context for PM2.5 and ozone air quality trends. *Air Qual Atmos*  
511 *Health*. 2013;6(1):1-11. doi:10.1007/s11869-010-0125-0
- 512 11. WHO. Ageing and health. Published 2022. Accessed July 17, 2024. [https://www.who.int/news-room/fact-](https://www.who.int/news-room/fact-sheets/detail/ageing-and-health)  
513 [sheets/detail/ageing-and-health](https://www.who.int/news-room/fact-sheets/detail/ageing-and-health)
- 514 12. Abed Al Ahad M, Demšar U, Sullivan F, Kulu H. Long-term exposure to air pollution and mortality in  
515 Scotland: A register-based individual-level longitudinal study. *Environmental Research*.  
516 2023;238:117223. doi:10.1016/j.envres.2023.117223
- 517 13. Anderson HR, Favarato G, Atkinson RW. Long-term exposure to air pollution and the incidence of  
518 asthma: meta-analysis of cohort studies. *Air Qual Atmos Health*. 2013;6(1):47-56. doi:10.1007/s11869-  
519 011-0144-5
- 520 14. WHO. Factsheet: Ambient (outdoor) air pollution. Published online 2021. Accessed October 13, 2022.  
521 [https://www.who.int/news-room/fact-sheets/detail/ambient-\(outdoor\)-air-quality-and-health](https://www.who.int/news-room/fact-sheets/detail/ambient-(outdoor)-air-quality-and-health)
- 522 15. WHO. 7 million premature deaths annually linked to air pollution. Published online 2014.  
523 <https://www.who.int/news/item/25-03-2014-7-million-premature-deaths-annually-linked-to-air-pollution>
- 524 16. World Bank. *Getting Down to Earth: Are Satellites Reliable for Measuring Air Pollutants That Cause*  
525 *Mortality in Low- and Middle-Income Countries?* World Bank; 2022. doi:10.1596/978-1-4648-1727-4
- 526 17. IQAir. World Air Quality Report 2023. Published online 2023.
- 527 18. Yadav R, Deora S, Yadav G. Air pollution and its impact on cardiovascular health – It’s time to act fast!  
528 *Indian Heart J*. 2021;73(1):1-6. doi:10.1016/j.ihj.2021.01.021

- 529 19. Pandey A, Brauer M, Cropper ML, et al. Health and economic impact of air pollution in the states of  
530 India: the Global Burden of Disease Study 2019. *The Lancet Planetary Health*. 2021;5(1):e25-e38.  
531 doi:10.1016/S2542-5196(20)30298-9
- 532 20. Chen B, Kan H. Air pollution and population health: a global challenge. *Environ Health Prev Med*.  
533 2008;13(2):94-101. doi:10.1007/s12199-007-0018-5
- 534 21. Samet JM, Chung YS. Air quality, atmosphere, and health. *Air Qual Atmos Health*. 2008;1(1):1-2.  
535 doi:10.1007/s11869-008-0007-x
- 536 22. EPIC. Air Quality Life Index: India Fact sheet. Published online 2022. Accessed October 13, 2022.  
537 [https://aqli.epic.uchicago.edu/wp-content/uploads/2022/06/IndiaFactSheet\\_2022\\_India-version.pdf](https://aqli.epic.uchicago.edu/wp-content/uploads/2022/06/IndiaFactSheet_2022_India-version.pdf)
- 538 23. World Bank. Getting Down to Earth: Are Satellites Reliable for Measuring Air Pollutants that Cause  
539 Mortality in Low- and Middle-Income Countries? International Development in Focus. Published online  
540 2021.
- 541 24. Brumberg HL, Karr CJ, COUNCIL ON ENVIRONMENTAL HEALTH. Ambient Air Pollution: Health  
542 Hazards to Children. *Pediatrics*. 2021;147(6):e2021051484. doi:10.1542/peds.2021-051484
- 543 25. Mahapatra B, Walia M, Avis WR, Saggurti N. Effect of exposure to PM10 on child health: evidence  
544 based on a large-scale survey from 184 cities in India. *BMJ Glob Health*. 2020;5(8):e002597.  
545 doi:10.1136/bmjgh-2020-002597
- 546 26. Guarnieri M, Balmes JR. Outdoor air pollution and asthma. *Lancet*. 2014;383(9928):1581-1592.  
547 doi:10.1016/S0140-6736(14)60617-6
- 548 27. Stieb DM, Chen L, Eshoul M, Judek S. Ambient air pollution, birth weight and preterm birth: a systematic  
549 review and meta-analysis. *Environ Res*. 2012;117:100-111. doi:10.1016/j.envres.2012.05.007
- 550 28. Solomon PA, Costantini M, Grahame TJ, et al. Air pollution and health: bridging the gap from sources to  
551 health outcomes: conference summary. *Air Qual Atmos Health*. 2012;5(1):9-62. doi:10.1007/s11869-011-  
552 0161-4
- 553 29. Kumar P, Kausar MohdA, Singh AB, Singh R. Biological contaminants in the indoor air environment and  
554 their impacts on human health. *Air Qual Atmos Health*. 2021;14(11):1723-1736. doi:10.1007/s11869-021-  
555 00978-z
- 556 30. Orru H, Maasikmets M, Lai T, et al. Health impacts of particulate matter in five major Estonian towns:  
557 main sources of exposure and local differences. *Air Qual Atmos Health*. 2011;4(3):247-258.  
558 doi:10.1007/s11869-010-0075-6
- 559 31. Dadvand P, Parker J, Bell ML, et al. Maternal exposure to particulate air pollution and term birth weight:  
560 a multi-country evaluation of effect and heterogeneity. *Environ Health Perspect*. 2013;121(3):267-373.  
561 doi:10.1289/ehp.1205575
- 562 32. Shah PS, Balkhair T, Knowledge Synthesis Group on Determinants of Preterm/LBW births. Air pollution  
563 and birth outcomes: a systematic review. *Environ Int*. 2011;37(2):498-516.  
564 doi:10.1016/j.envint.2010.10.009
- 565 33. Risnes KR, Vatten LJ, Baker JL, et al. Birthweight and mortality in adulthood: a systematic review and  
566 meta-analysis. *Int J Epidemiol*. 2011;40(3):647-661. doi:10.1093/ije/dyq267
- 567 34. WHO. Factsheet: Preterm birth. Published online 2018. Accessed October 13, 2022.  
568 <https://www.who.int/news-room/fact-sheets/detail/preterm-birth>
- 569 35. UNICEF. Low birth weight. Published online 2022. <https://data.unicef.org/topic/nutrition/low-birthweight/>
- 570
- 571 36. Goyal N, Canning D. The association of in-utero exposure to ambient fine particulate air pollution with  
572 low birth weight in India. *Environ Res Lett*. 2021;16(5):054034. doi:10.1088/1748-9326/abf18e

- 573 37. Shah PS, Balkhair T. Air pollution and birth outcomes: A systematic review. *Environment International*.  
574 2011;37(2):498-516. doi:10.1016/j.envint.2010.10.009
- 575 38. Balakrishnan K, Ghosh S, Thangavel G, et al. Exposures to fine particulate matter (PM2.5) and  
576 birthweight in a rural-urban, mother-child cohort in Tamil Nadu, India. *Environ Res*. 2018;161:524-531.  
577 doi:10.1016/j.envres.2017.11.050
- 578 39. Balakrishnan K, Ghosh S, Thangavel G, et al. Exposures to fine particulate matter (PM2.5) and  
579 birthweight in a rural-urban, mother-child cohort in Tamil Nadu, India. *Environ Res*. 2018;161:524-531.  
580 doi:10.1016/j.envres.2017.11.050
- 581 40. Bachwenkizi J, Liu C, Meng X, et al. Maternal exposure to fine particulate matter and preterm birth and  
582 low birth weight in Africa. *Environ Int*. 2022;160:107053. doi:10.1016/j.envint.2021.107053
- 583 41. Huang FH. Explore Home Care Needs and Satisfaction for Elderly People with Chronic Disease and their  
584 Family Members. *Procedia Manufacturing*. 2015;3:173-179. doi:10.1016/j.promfg.2015.07.123
- 585 42. Li Q, Wang Y yuan, Guo Y, et al. Effect of airborne particulate matter of 2.5 µm or less on preterm birth:  
586 A national birth cohort study in China. *Environment International*. 2018;121:1128-1136.  
587 doi:10.1016/j.envint.2018.10.025
- 588 43. Liu X, Zhu Y, Xue L, Desai AR, Wang H. Cluster-Enhanced Ensemble Learning for Mapping Global  
589 Monthly Surface Ozone From 2003 to 2019. *Geophysical Research Letters*.  
590 2022;49(11):e2022GL097947. doi:10.1029/2022GL097947
- 591 44. Chawanpaiboon S, Vogel JP, Moller AB, et al. Global, regional, and national estimates of levels of  
592 preterm birth in 2014: a systematic review and modelling analysis. *The Lancet Global Health*.  
593 2019;7(1):e37-e46. doi:10.1016/S2214-109X(18)30451-0
- 594 45. UNDESA. 2018 Revision of World Urbanization Prospects. Published online 2018.  
595 <https://www.un.org/development/desa/publications/2018-revision-of-world-urbanization-prospects.html>
- 596 46. IIPS, ICF. National Family Health Survey. *international Institute for Population Sciences, Mumbai*.  
597 Published online 2022. [http://rchiips.org/nfhs/NFHS-5Reports/NFHS-5\\_INDIA\\_REPORT.pdf](http://rchiips.org/nfhs/NFHS-5Reports/NFHS-5_INDIA_REPORT.pdf)
- 598 47. van Donkelaar A, Hammer MS, Bindle L, et al. Monthly Global Estimates of Fine Particulate Matter and  
599 Their Uncertainty. *Environ Sci Technol*. 2021;55(22):15287-15300. doi:10.1021/acs.est.1c05309
- 600 48. Boing AF, deSouza P, Boing AC, Kim R, Subramanian SV. Air Pollution, Socioeconomic Status, and  
601 Age-Specific Mortality Risk in the United States. *JAMA Network Open*. 2022;5(5):e2213540.  
602 doi:10.1001/jamanetworkopen.2022.13540
- 603 49. Yu Z, Hu N, Du Y, et al. Association of outdoor artificial light at night with mental health among China  
604 adults: a prospective ecology study. *Environ Sci Pollut Res*. Published online June 25, 2022.  
605 doi:10.1007/s11356-022-21587-y
- 606 50. Ran Q, Lee SY, Zheng D, et al. Potential health and economic impacts of shifting manufacturing from  
607 China to Indonesia or India. *Science of The Total Environment*. 2023;855:158634.  
608 doi:10.1016/j.scitotenv.2022.158634
- 609 51. Jin H, Zhong R, Liu M, Ye C, Chen X. Spatiotemporal distribution characteristics of PM2.5 concentration  
610 in China from 2000 to 2018 and its impact on population. *Journal of Environmental Management*.  
611 2022;323:116273. doi:10.1016/j.jenvman.2022.116273
- 612 52. de Leeuw G, Fan C, Li Z, et al. Spatiotemporal variation and provincial scale differences of the AOD  
613 across China during 2000–2021. *Atmospheric Pollution Research*. 2022;13(4):101359.  
614 doi:10.1016/j.apr.2022.101359
- 615 53. Wensu Z, Wen C, Fenfen Z, Wenjuan W, Li L. The Association Between Long-Term Exposure to  
616 Particulate Matter and Incidence of Hypertension Among Chinese Elderly: A Retrospective Cohort Study.  
617 *Front Cardiovasc Med*. 2022;8:784800. doi:10.3389/fcvm.2021.784800

- 618 54. Zhang L, Wilson JP, Zhao N, Zhang W, Wu Y. The dynamics of cardiovascular and respiratory deaths  
619 attributed to long-term PM<sub>2.5</sub> exposures in global megacities. *Science of The Total Environment*.  
620 2022;842:156951. doi:10.1016/j.scitotenv.2022.156951
- 621 55. Peng J, Zheng Y, Liu C. The Impact of Urban Construction Land Use Change on Carbon Emissions:  
622 Evidence from the China Land Market in 2000–2019. *Land*. 2022;11(9):1440. doi:10.3390/land11091440
- 623 56. Shen Z, Yong B, Gourley JJ, et al. Recent global performance of the Climate Hazards group Infrared  
624 Precipitation (CHIRP) with Stations (CHIRPS). *Journal of Hydrology*. 2020;591:125284.  
625 doi:10.1016/j.jhydrol.2020.125284
- 626 57. Muñoz-Sabater J, Dutra E, Agustí-Panareda A, et al. ERA5-Land: a state-of-the-art global reanalysis  
627 dataset for land applications. *Earth System Science Data*. 2021;13(9):4349-4383. doi:10.5194/essd-13-  
628 4349-2021
- 629 58. Peng J, Dadson S, Hirpa F, et al. A pan-African high-resolution drought index dataset. *Earth System  
630 Science Data*. 2020;12(1):753-769. doi:10.5194/essd-12-753-2020
- 631 59. Jana A, Chattopadhyay A. Drought and Socioeconomic Drivers of Crop Diversity in India: A Panel  
632 Analysis. *Agric Res*. Published online August 7, 2023. doi:10.1007/s40003-023-00665-8
- 633 60. Dinku T, Funk C, Peterson P, et al. Validation of the CHIRPS satellite rainfall estimates over eastern  
634 Africa. *Quarterly Journal of the Royal Meteorological Society*. 2018;144(S1):292-312.  
635 doi:10.1002/qj.3244
- 636 61. WHO. Preterm birth. Geneva: WHO, Updated Nov 2015. Published online 2015. Accessed August 20,  
637 2021. <http://www.who.int/mediacentre/factsheets/fs363/en/>.
- 638 62. Jana A, Banerjee K, Khan PK. Early arrivals: association of maternal obstetric factors with preterm births  
639 and their survival in India. *Public Health*. 2022;211:37-46. doi:10.1016/j.puhe.2022.07.005
- 640 63. Gathimba NW, Wanjoya A, Kiplagat GK, Mbugua L, Kibiwott K. Modeling Maternal Risk Factors  
641 Affecting Low Birth Weight Among Infants in Kenya. *American Journal of Theoretical and Applied  
642 Statistics*. 2017;6(1):22. doi:10.11648/j.ajtas.20170601.13
- 643 64. Tellapragada C, Eshwara VK, Bhat P, et al. Risk Factors for Preterm Birth and Low Birth Weight Among  
644 Pregnant Indian Women: A Hospital-based Prospective Study. *J Prev Med Public Health*.  
645 2016;49(3):165-175. doi:10.3961/jpmph.16.022
- 646 65. Fotheringham AS, Yang W, Kang W. Multiscale Geographically Weighted Regression (MGWR). *Annals  
647 of the American Association of Geographers*. 2017;107(6):1247-1265.  
648 doi:10.1080/24694452.2017.1352480
- 649 66. Lam C, Souza PCL. Estimation and Selection of Spatial Weight Matrix in a Spatial Lag Model. *Journal of  
650 Business & Economic Statistics*. 2020;38(3):693-710. doi:10.1080/07350015.2019.1569526
- 651 67. Balakrishnan K, Ghosh S, Thangavel G, et al. Exposures to fine particulate matter (PM<sub>2.5</sub>) and  
652 birthweight in a rural-urban, mother-child cohort in Tamil Nadu, India. *Environmental Research*.  
653 2018;161:524-531. doi:10.1016/j.envres.2017.11.050
- 654 68. Fleischer NL, Merialdi M, van DA, et al. Outdoor Air Pollution, Preterm Birth, and Low Birth Weight:  
655 Analysis of the World Health Organization Global Survey on Maternal and Perinatal Health.  
656 *Environmental Health Perspectives*. 2014;122(4):425-430. doi:10.1289/ehp.1306837
- 657 69. Sun X, Luo X, Zhao C, et al. The associations between birth weight and exposure to fine particulate  
658 matter (PM<sub>2.5</sub>) and its chemical constituents during pregnancy: A meta-analysis. *Environ Pollut*.  
659 2016;211:38-47. doi:10.1016/j.envpol.2015.12.022
- 660 70. Das M, Das A, Sarkar R, Saha S, Mandal A. Examining the impact of lockdown (due to COVID-19) on  
661 ambient aerosols (PM<sub>2.5</sub>): A study on Indo-Gangetic Plain (IGP) Cities, India. *Stoch Environ Res Risk  
662 Assess*. 2021;35(6):1301-1317. doi:10.1007/s00477-020-01905-x



- 663 71. Jat R, Gurjar BR. Contribution of different source sectors and source regions of Indo-Gangetic Plain in  
664 India to PM<sub>2.5</sub> pollution and its short-term health impacts during peak polluted winter. *Atmospheric*  
665 *Pollution Research*. 2021;12(4):89-100. doi:10.1016/j.apr.2021.02.016
- 666 72. Mhawish A, Banerjee T, Sorek-Hamer M, et al. Estimation of High-Resolution PM<sub>2.5</sub> over the Indo-  
667 Gangetic Plain by Fusion of Satellite Data, Meteorology, and Land Use Variables. *Environ Sci Technol*.  
668 2020;54(13):7891-7900. doi:10.1021/acs.est.0c01769
- 669 73. Singh N, Murari V, Kumar M, Barman SC, Banerjee T. Fine particulates over South Asia: Review and  
670 meta-analysis of PM<sub>2.5</sub> source apportionment through receptor model. *Environmental Pollution*.  
671 2017;223:121-136. doi:10.1016/j.envpol.2016.12.071
- 672 74. Pandey A, Brauer M, Cropper ML, et al. Health and economic impact of air pollution in the states of  
673 India: the Global Burden of Disease Study 2019. *The Lancet Planetary Health*. 2021;5(1):e25-e38.  
674 doi:10.1016/S2542-5196(20)30298-9
- 675 75. Guo H, Kota SH, Sahu SK, et al. Source apportionment of PM<sub>2.5</sub> in North India using source-oriented air  
676 quality models. *Environmental Pollution*. 2017;231:426-436. doi:10.1016/j.envpol.2017.08.016
- 677 76. Venkataraman C, Brauer M, Tibrewal K, et al. Source influence on emission pathways and ambient PM<sub>2.5</sub>  
678 pollution over India (2015–2050). *Atmospheric Chemistry and Physics*. 2018;18(11):8017-8039.  
679 doi:10.5194/acp-18-8017-2018
- 680 77. Singh V, Singh S, Biswal A, Kesarkar AP, Mor S, Ravindra K. Diurnal and temporal changes in air  
681 pollution during COVID-19 strict lockdown over different regions of India. *Environmental Pollution*.  
682 2020;266:115368. doi:10.1016/j.envpol.2020.115368
- 683 78. Saxena P, Sonwani S, Srivastava A, et al. Impact of crop residue burning in Haryana on the air quality of  
684 Delhi, India. *Heliyon*. 2021;7(5):e06973. doi:10.1016/j.heliyon.2021.e06973
- 685 79. Singh T, Biswal A, Mor S, Ravindra K, Singh V, Mor S. A high-resolution emission inventory of air  
686 pollutants from primary crop residue burning over Northern India based on VIIRS thermal anomalies.  
687 *Environmental Pollution*. 2020;266:115132. doi:10.1016/j.envpol.2020.115132
- 688 80. Xing YF, Xu YH, Shi MH, Lian YX. The impact of PM<sub>2.5</sub> on the human respiratory system. *J Thorac*  
689 *Dis*. 2016;8(1):E69-E74. doi:10.3978/j.issn.2072-1439.2016.01.19
- 690 81. Deng X, Zhang F, Rui W, et al. PM<sub>2.5</sub>-induced oxidative stress triggers autophagy in human lung  
691 epithelial A549 cells. *Toxicol In Vitro*. 2013;27(6):1762-1770. doi:10.1016/j.tiv.2013.05.004
- 692 82. Fongsodsri K, Chamnanchanunt S, Desakorn V, et al. Particulate Matter 2.5 and Hematological Disorders  
693 From Dust to Diseases: A Systematic Review of Available Evidence. *Frontiers in Medicine*. 2021;8.  
694 Accessed October 17, 2022. <https://www.frontiersin.org/articles/10.3389/fmed.2021.692008>
- 695 83. Kaur K, Lesseur C, Deyssenroth MA, et al. PM<sub>2.5</sub> exposure during pregnancy is associated with altered  
696 placental expression of lipid metabolic genes in a US birth cohort. *Environmental Research*.  
697 2022;211:113066. doi:10.1016/j.envres.2022.113066
- 698 84. Leung M, Weisskopf MG, Laden F, et al. Exposure to PM<sub>2.5</sub> during Pregnancy and Fetal Growth in  
699 Eastern Massachusetts, USA. *Environmental Health Perspectives*. 130(1):017004. doi:10.1289/EHP9824
- 700 85. Liu Y, Wang L, Wang F, Li C. Effect of Fine Particulate Matter (PM<sub>2.5</sub>) on Rat Placenta Pathology and  
701 Perinatal Outcomes. *Med Sci Monit*. 2016;22:3274-3280. doi:10.12659/MSM.897808
- 702 86. Li H, Cai J, Chen R, et al. Particulate Matter Exposure and Stress Hormone Levels. *Circulation*.  
703 2017;136(7):618-627. doi:10.1161/CIRCULATIONAHA.116.026796
- 704 87. Sonwani S, Madaan S, Arora J, et al. Inhalation Exposure to Atmospheric Nanoparticles and Its  
705 Associated Impacts on Human Health: A Review. *Frontiers in Sustainable Cities*. 2021;3. Accessed  
706 October 17, 2022. <https://www.frontiersin.org/articles/10.3389/frsc.2021.690444>

- 707 88. Zhou S, Xi Y, Chen Y, et al. Ovarian Dysfunction Induced by Chronic Whole-Body PM2.5 Exposure.  
708 *Small*. 2020;16(33):2000845. doi:10.1002/smll.202000845
- 709 89. Zhu N, Ji X, Geng X, Yue H, Li G, Sang N. Maternal PM2.5 exposure and abnormal placental nutrient  
710 transport. *Ecotoxicology and Environmental Safety*. 2021;207:111281. doi:10.1016/j.ecoenv.2020.111281
- 711 90. Nachman RM, Mao G, Zhang X, et al. Intrauterine Inflammation and Maternal Exposure to Ambient  
712 PM2.5 during Preconception and Specific Periods of Pregnancy: The Boston Birth Cohort. *Environ*  
713 *Health Perspect*. 2016;124(10):1608-1615. doi:10.1289/EHP243
- 714 91. Alman BL, Stingone JA, Yazdy M, et al. Associations between PM2.5 and risk of preterm birth among  
715 liveborn infants. *Ann Epidemiol*. 2019;39:46-53.e2. doi:10.1016/j.annepidem.2019.09.008
- 716 92. Zhang X, Fan C, Ren Z, et al. Maternal PM2.5 exposure triggers preterm birth: a cross-sectional study in  
717 Wuhan, China. *Global Health Research and Policy*. 2020;5(1):17. doi:10.1186/s41256-020-00144-5
- 718 93. Grippo A, Zhang J, Chu L, et al. Air pollution exposure during pregnancy and spontaneous abortion and  
719 stillbirth. *Rev Environ Health*. 2018;33(3):247-264. doi:10.1515/reveh-2017-0033
- 720 94. Wilcox AJ, Morken NH, Weinberg CR, Håberg SE, Magnus MC. Role of maternal age and pregnancy  
721 history in risk of miscarriage: prospective register based study. *BMJ*. 2019;364:1869.  
722 doi:10.1136/bmj.1869
- 723 95. Xie G, Sun L, Yang W, et al. Maternal exposure to PM2.5 was linked to elevated risk of stillbirth.  
724 *Chemosphere*. 2021;283:131169. doi:10.1016/j.chemosphere.2021.131169
- 725 96. Deng Q, Lu C, Li Y, Sundell J, Dan Norbäck null. Exposure to outdoor air pollution during trimesters of  
726 pregnancy and childhood asthma, allergic rhinitis, and eczema. *Environ Res*. 2016;150:119-127.  
727 doi:10.1016/j.envres.2016.05.050
- 728 97. Langford K, Nicolaides K, Miell JP. Maternal and fetal insulin-like growth factors and their binding  
729 proteins in the second and third trimesters of human pregnancy. *Human Reproduction*. 1998;13(5):1389-  
730 1393. doi:10.1093/humrep/13.5.1389
- 731 98. Fleisch AF, Rifas-Shiman SL, Koutrakis P, et al. Prenatal Exposure to Traffic Pollution: Associations  
732 with Reduced Fetal Growth and Rapid Infant Weight Gain. *Epidemiology*. 2015;26(1):43-50.  
733 doi:10.1097/EDE.0000000000000203
- 734 99. Karachaliou M, Georgiou V, Roumeliotaki T, et al. Association of trimester-specific gestational weight  
735 gain with fetal growth, offspring obesity, and cardiometabolic traits in early childhood. *American Journal*  
736 *of Obstetrics and Gynecology*. 2015;212(4):502.e1-502.e14. doi:10.1016/j.ajog.2014.12.038
- 737 100. Janssen BG, Saenen ND, Roels HA, et al. Fetal Thyroid Function, Birth Weight, and in Utero Exposure to  
738 Fine Particle Air Pollution: A Birth Cohort Study. *Environ Health Perspect*. 2017;125(4):699-705.  
739 doi:10.1289/EHP508
- 740 101. Roland MCP, Friis CM, Godang K, Bollerslev J, Haugen G, Henriksen T. Maternal Factors Associated  
741 with Fetal Growth and Birthweight Are Independent Determinants of Placental Weight and Exhibit  
742 Differential Effects by Fetal Sex. *PLoS One*. 2014;9(2):e87303. doi:10.1371/journal.pone.0087303
- 743 102. Vorherr H. Factors influencing fetal growth. *Am J Obstet Gynecol*. 1982;142(5):577-588.  
744 doi:10.1016/0002-9378(82)90765-7
- 745 103. Workalemahu T, Grantz KL, Grewal J, Zhang C, Louis GMB, Tekola-Ayele F. Genetic and  
746 Environmental Influences on Fetal Growth Vary during Sensitive Periods in Pregnancy. *Sci Rep*.  
747 2018;8(1):7274. doi:10.1038/s41598-018-25706-z
- 748 104. Chawla D. Survival of Very-Low-Birth-Weight Neonates in India. *Indian J Pediatr*. 2021;88(4):326-327.  
749 doi:10.1007/s12098-021-03710-y



- 750 105. Halli SS, Biradar RA, Prasad JB. Low Birth Weight, the Differentiating Risk Factor for Stunting among  
751 Preschool Children in India. *International Journal of Environmental Research and Public Health*.  
752 2022;19(7):3751. doi:10.3390/ijerph19073751
- 753 106. Swaminathan S, Hemalatha R, Pandey A, et al. The burden of child and maternal malnutrition and trends  
754 in its indicators in the states of India: the Global Burden of Disease Study 1990–2017. *The Lancet Child*  
755 *& Adolescent Health*. 2019;3(12):855-870. doi:10.1016/S2352-4642(19)30273-1
- 756 107. Epstein MB, Bates MN, Arora NK, Balakrishnan K, Jack DW, Smith KR. Household fuels, low birth  
757 weight, and neonatal death in India: the separate impacts of biomass, kerosene, and coal. *Int J Hyg*  
758 *Environ Health*. 2013;216(5):523-532. doi:10.1016/j.ijheh.2012.12.006
- 759 108. Islam S, Mohanty SK. Maternal exposure to cooking smoke and risk of low birth weight in India. *Science*  
760 *of The Total Environment*. 2021;774:145717. doi:10.1016/j.scitotenv.2021.145717
- 761 109. Bonell A, Sonko B, Badjie J, et al. Environmental heat stress on maternal physiology and fetal blood flow  
762 in pregnant subsistence farmers in The Gambia, west Africa: an observational cohort study. *The Lancet*  
763 *Planetary Health*. 2022;6(12):e968-e976. doi:10.1016/S2542-5196(22)00242-X
- 764 110. Hunter PR. Climate change and waterborne and vector-borne disease. *J Appl Microbiol*. 2003;94  
765 Suppl:37S-46S. doi:10.1046/j.1365-2672.94.s1.5.x
- 766 111. Rodriguez-Llanes JM, Ranjan-Dash S, Mukhopadhyay A, Guha-Sapir D. Flood-Exposure is Associated  
767 with Higher Prevalence of Child Undernutrition in Rural Eastern India. *International Journal of*  
768 *Environmental Research and Public Health*. 2016;13(2):210. doi:10.3390/ijerph13020210
- 769

Table 1. Sample distribution used in the analysis

| <b>Variables</b>                | <b>Sample</b> | <b>Percentage</b> |
|---------------------------------|---------------|-------------------|
| <b>Preterm birth</b>            |               |                   |
| No                              | 2,01,657      | 87.45             |
| Yes                             | 28,933        | 12.55             |
| <b>Low birth weight</b>         |               |                   |
| No                              | 1,71,116      | 82.6              |
| Yes                             | 36,039        | 17.4              |
| <b>Sex of the child</b>         |               |                   |
| Male                            | 1,19,474      | 51.81             |
| Female                          | 1,11,116      | 48.19             |
| <b>Birth order</b>              |               |                   |
| 1                               | 88,235        | 38.26             |
| 2                               | 1,11,898      | 48.53             |
| 3+                              | 30,457        | 13.21             |
| <b>Mother's age at delivery</b> |               |                   |
| Below 20                        | 26,282        | 11.4              |
| 20-24                           | 98,137        | 42.56             |
| 25-29                           | 68,494        | 29.7              |
| 30&above                        | 37,677        | 16.34             |
| <b>Place of delivery</b>        |               |                   |
| Home                            | 31,331        | 13.59             |
| Hospital                        | 1,99,259      | 86.41             |
| <b>Place of residence</b>       |               |                   |
| Rural                           | 1,84,038      | 79.81             |
| Urban                           | 46,552        | 20.19             |
| <b>Mother's body mass index</b> |               |                   |
| Underweight                     | 42,112        | 18.73             |
| Normal                          | 1,42,504      | 63.38             |
| Overweight/obese                | 40,208        | 17.88             |
| <b>Mother's education</b>       |               |                   |
| Illiterate/primary              | 80,636        | 34.97             |
| Secondary                       | 1,18,602      | 51.43             |
| Higher                          | 31,352        | 13.6              |
| <b>Wealth status</b>            |               |                   |
| Poor                            | 1,16,744      | 50.63             |
| Middle                          | 44,700        | 19.39             |
| Rich                            | 69,146        | 29.99             |
| <b>Religion</b>                 |               |                   |
| Hindu                           | 1,69,233      | 73.39             |
| Muslim                          | 33,194        | 14.4              |
| Others                          | 28,163        | 12.21             |
| <b>Cooking fuel</b>             |               |                   |
| Clean fuel                      | 97,582        | 42.32             |
| Solid fuel                      | 1,33,008      | 57.68             |

Table 2. Adjusted and unadjusted odds ratio showing the effects of in-utero exposure to PM<sub>2.5</sub> on low birth weight and preterm birth

| Determinants                               | Low birth weight   |                     | Preterm birth      |                    |
|--------------------------------------------|--------------------|---------------------|--------------------|--------------------|
|                                            | OR                 | AOR                 | OR                 | AOR                |
| <b>PM<sub>2.5</sub> (µg/m<sup>3</sup>)</b> |                    |                     |                    |                    |
| < mean                                     |                    |                     |                    |                    |
| >= mean                                    | 1.56***(1.50 1.63) | 1.37***(1.29 1.45)  | 1.62***(1.55 1.69) | 1.67***(1.57 1.77) |
| <b>Temperature (°C)</b>                    |                    |                     |                    |                    |
| < mean                                     |                    |                     |                    |                    |
| >= mean                                    |                    | 1.14***(1.01 1.04)  |                    | 0.98 (0.96 1.01)   |
| <b>Rainfall (mm)</b>                       |                    |                     |                    |                    |
| < mean                                     |                    |                     |                    |                    |
| >= mean                                    |                    | 1.07***(1.03 1.12)  |                    | 1.04***(1.02 1.10) |
| <b>Sex of the child</b>                    |                    |                     |                    |                    |
| Male (Ref)                                 |                    |                     |                    |                    |
| Female                                     |                    | 1.18***(1.15 1.20)  |                    | 0.97**(0.95 1)     |
| <b>Birth order</b>                         |                    |                     |                    |                    |
| 1 (Ref)                                    |                    |                     |                    |                    |
| 2                                          |                    | 0.89***(0.86 0.91)  |                    | 0.99 (0.96 1.02)   |
| 3+                                         |                    | 0.84***(0.8 0.88)   |                    | 0.94***(0.89 0.98) |
| <b>Mother's age at delivery</b>            |                    |                     |                    |                    |
| Below 20                                   |                    | 1.09***(1.04 1.15)  |                    | 1.08***(1.02 1.14) |
| 20-24                                      |                    | 1.03 (0.99 1.07)    |                    | 1.03 (0.98 1.07)   |
| 25-29                                      |                    | 1 (0.96 1.03)       |                    | 0.97 (0.93 1.01)   |
| 30&above (Ref)                             |                    |                     |                    |                    |
| <b>Place of delivery</b>                   |                    |                     |                    |                    |
| Home (Ref)                                 |                    | 1.11***(1.06 1.16)  |                    | 1.00 (0.97 1.04)   |
| Hospital                                   |                    |                     |                    |                    |
| <b>Place of residence</b>                  |                    |                     |                    |                    |
| Rural (Ref)                                |                    |                     |                    |                    |
| Urban                                      |                    | 1.07***(1.04 1.11)  |                    | 0.96**(0.92 0.99)  |
| <b>Mother's body mass index</b>            |                    |                     |                    |                    |
| Normal (Ref)                               |                    |                     |                    |                    |
| Underweight                                |                    | 1.27***(1.24 1.31)  |                    | 1.04***(1.01 1.08) |
| Overweight/obese                           |                    | 0.93***(0.9 0.96)   |                    | 0.95***(0.92 0.99) |
| <b>Mother's education</b>                  |                    |                     |                    |                    |
| Illiterate/primary                         |                    | 1.40***(1.34 1.46)  |                    |                    |
| Secondary                                  |                    | 1.23***(1.18 1.28)  |                    | 1.00 (0.95 1.04)   |
| Higher (Ref)                               |                    |                     |                    | 0.95**(0.91 0.99)  |
| <b>Wealth status</b>                       |                    |                     |                    |                    |
| Poor                                       |                    | 1.09***(1.05 1.13)  |                    | 0.92***(0.88 0.95) |
| Middle                                     |                    | 0.98 (0.94 1.02)    |                    | 0.95**(0.92 0.99)  |
| Rich (Ref)                                 |                    |                     |                    |                    |
| <b>Religion</b>                            |                    |                     |                    |                    |
| Hindu (Ref)                                |                    |                     |                    |                    |
| Muslim                                     |                    | 0.87***(0.84 0.91)  |                    | 0.97 (0.94 1.01)   |
| Others                                     |                    | 0.70***(0.67 0.73)  |                    | 0.88***(0.84 0.92) |
| <b>Cooking fuel</b>                        |                    |                     |                    |                    |
| Clean fuel (Ref)                           |                    |                     |                    |                    |
| Solid fuel                                 |                    | 1.04 ***(1.01 1.07) |                    | 0.94 (0.91 1.03)   |

Note: Ref: Reference category; \*\*\* p < 0.001, \*\* < 0.05, \* p < 0.1

Table 3. Sensitivity analysis of the effects of PM<sub>2.5</sub> on low birth weight and preterm birth

| Adjusted characteristic                              | Low birth weight |         |        |       | Preterm birth |         |        |       |
|------------------------------------------------------|------------------|---------|--------|-------|---------------|---------|--------|-------|
|                                                      | Odds ratio       | P value | 95% CI |       | Odds ratio    | P value | 95% CI |       |
|                                                      |                  |         | Lower  | Upper |               |         | Lower  | Upper |
| <b>Unadjusted</b>                                    | 1.56             | <0.00   | 1.50   | 1.63  | 1.62          | <0.00   | 1.55   | 1.69  |
| Temperature (°C)                                     | 1.46             | <0.00   | 1.40   | 1.52  | 1.69          | <0.00   | 1.62   | 1.76  |
| Climatic factors<br>(temperature + rainfall)         | 1.39             | <0.00   | 1.33   | 1.45  | 1.57          | <0.00   | 1.50   | 1.65  |
| Cooking fuel                                         | 1.53             | <0.00   | 1.47   | 1.60  | 1.63          | <0.00   | 1.57   | 1.71  |
| Child characteristics                                | 1.59             | <0.00   | 1.51   | 1.68  | 1.76          | <0.00   | 1.67   | 1.87  |
| Mothers' characteristics                             | 1.52             | <0.00   | 1.45   | 1.58  | 1.61          | <0.00   | 1.54   | 1.69  |
| Socioeconomic factors                                | 1.48             | <0.00   | 1.42   | 1.54  | 1.59          | <0.00   | 1.52   | 1.66  |
| Socioeconomic, child and<br>mothers' Characteristics | 1.45             | <0.00   | 1.37   | 1.54  | 1.70          | <0.00   | 1.60   | 1.80  |
| All the determinants                                 | 1.37             | <0.00   | 1.29   | 1.45  | 1.67          | <0.00   | 1.57   | 1.77  |

Table 4. spatial regression models showing the spatial association between PM<sub>2.5</sub> and low birth weight adjusted confounding factors

| Variables                                    | OLS         |       | GWR         |       | MGWR        |       | SLM         |       | SEM         |       |
|----------------------------------------------|-------------|-------|-------------|-------|-------------|-------|-------------|-------|-------------|-------|
|                                              | Coefficient | SE    | Coefficient | SE    | Coefficient | SE    | Coefficient | SE    | Coefficient | SE    |
| <b>PM<sub>2.5</sub></b> (µg/m <sup>3</sup> ) | 0.059       | 0.009 | 0.122       | 0.009 | 0.119       | 0.016 | 0.043       | 0.014 | 0.031       | 0.008 |
| Underweighted mother                         | 0.159       | 0.031 | 0.179       | 0.007 | 0.163       | 0.003 | 0.124       | 0.032 | 0.102       | 0.027 |
| Illiterate mother                            | 0.061       | 0.018 | 0.095       | 0.009 | 0.013       | 0.001 | 0.068       | 0.021 | 0.040       | 0.016 |
| Belong to poor family                        | -0.053      | 0.015 | 0.234       | 0.008 | 0.494       | 0.000 | -0.011      | 0.019 | -0.022      | 0.013 |
| Hindu religion                               | 0.010       | 0.009 | -0.055      | 0.006 | -0.017      | 0.002 | 0.007       | 0.011 | -0.002      | 0.008 |
| Non-institutional delivery                   | -0.083      | 0.025 | -0.067      | 0.008 | -0.155      | 0.000 | -0.060      | 0.027 | -0.057      | 0.022 |
| Using solid cooking fuel                     | 0.062       | 0.014 | 0.126       | 0.009 | -0.118      | 0.000 | 0.024       | 0.017 | 0.028       | 0.013 |
| Belong to rural areas                        | -0.018      | 0.012 | -0.137      | 0.008 | -0.114      | 0.005 | 0.002       | 0.012 | -0.001      | 0.011 |
| Female child                                 | -0.005      | 0.058 | 0.003       | 0.003 | 0.001       | 0.004 | 0.008       | 0.048 | 0.001       | 0.050 |
| Teen aged mothers                            | 0.022       | 0.034 | 0.066       | 0.007 | 0.101       | 0.007 | 0.023       | 0.040 | 0.005       | 0.030 |
| Having 3& more births                        | -0.090      | 0.046 | -0.122      | 0.007 | -0.03       | 0.005 | -0.102      | 0.048 | -0.069      | 0.040 |
| Average rainfall (°C)                        | 0.000       | 0.003 | -0.071      | 0.005 | -0.055      | 0.000 | -0.003      | 0.003 | 0.001       | 0.003 |
| Average temperature (mm)                     | 0.041       | 0.041 | 0.026       | 0.007 | 0.165       | 0.000 | 0.105       | 0.052 | 0.023       | 0.036 |
| R <sup>2</sup>                               | 0.34        |       |             |       | 0.68        |       | 0.49        |       | 0.52        |       |
| <b>AIC</b>                                   | 4192.36     |       |             |       | 1420.83     |       | 4045.78     |       | 4022.85     |       |

Table 5. spatial regression models showing the spatial association between PM<sub>2.5</sub> and preterm birth adjusted confounding factors

| Variables                                    | OLS         |       | GWR         |       | MGWR        |       | SLM         |       | SEM         |       |
|----------------------------------------------|-------------|-------|-------------|-------|-------------|-------|-------------|-------|-------------|-------|
|                                              | Coefficient | SE    | Coefficient | SE    | Coefficient | SE    | Coefficient | SE    | Coefficient | SE    |
| <b>PM<sub>2.5</sub></b> (µg/m <sup>3</sup> ) | 0.043       | 0.016 | 0.053       | 0.012 | 0.041       | 0.018 | 0.018       | 0.014 | 0.035       | 0.024 |
| Underweighted mother                         | 0.009       | 0.053 | 0.051       | 0.014 | 0.044       | 0.012 | -0.022      | 0.046 | -0.059      | 0.056 |
| Illiterate mother                            | 0.035       | 0.030 | 0.169       | 0.011 | 0.214       | 0.000 | 0.030       | 0.026 | 0.070       | 0.036 |
| Belong to poor family                        | -0.055      | 0.026 | -0.121      | 0.018 | -0.140      | 0.000 | -0.024      | 0.022 | -0.029      | 0.033 |
| Hindu religion                               | 0.050       | 0.016 | 0.078       | 0.010 | 0.038       | 0.003 | 0.023       | 0.014 | 0.023       | 0.019 |
| Non-institutional delivery                   | 0.050       | 0.043 | 0.047       | 0.019 | 0.071       | 0.006 | 0.022       | 0.037 | 0.008       | 0.046 |
| Using solid cooking fuel                     | -0.014      | 0.025 | -0.096      | 0.015 | -0.045      | 0.005 | -0.019      | 0.021 | -0.048      | 0.030 |
| Belong to rural areas                        | 0.044       | 0.021 | 0.054       | 0.005 | 0.062       | 0.000 | 0.027       | 0.018 | 0.042       | 0.021 |
| Female child                                 | 0.032       | 0.100 | 0.031       | 0.009 | 0.045       | 0.004 | 0.030       | 0.086 | 0.038       | 0.084 |
| Teen aged mothers                            | 0.028       | 0.059 | 0.022       | 0.005 | 0.022       | 0.001 | 0.019       | 0.051 | 0.027       | 0.069 |
| Having 3& more births                        | 0.053       | 0.078 | 0.096       | 0.009 | 0.05        | 0.013 | 0.014       | 0.068 | 0.003       | 0.082 |
| Average rainfall (°C)                        | 0.000       | 0.005 | 0.030       | 0.008 | 0.030       | 0.003 | 0.000       | 0.004 | -0.001      | 0.005 |
| Average temperature (mm)                     | -0.291      | 0.070 | -0.143      | 0.013 | -0.112      | 0.009 | -0.117      | 0.061 | -0.106      | 0.089 |
| R <sup>2</sup>                               | 0.17        |       |             |       | 0.54        |       | 0.29        |       | 0.31        |       |
| <b>AIC</b>                                   | 4953.57     |       |             |       | 1645.21     |       | 4810.00     |       | 4796.55     |       |



Figure 1. (a) Spatial distribution of in-utero exposure to  $PM_{2.5}$ , (b) low birth weight and (c) preterm birth across in India

Figure 2. Weighted percentage of low birth weight and preterm birth by background characteristics

Figure 3. Susceptibility to (a) low birth weight, and (b) preterm birth due to the in-utero exposure to  $PM_{2.5}$ .

Figure 4. Bivariate LISA map showing the spatial association between in-utero exposure to  $PM_{2.5}$  and low birth weight (a) and preterm birth (b).

Figure 5. Predicted low birth weight (LBW) and preterm birth (PTB) results from Ordinary List Square (OLS), Geographically Weighed Regression (GWR), Multiscale Geographically Weighed Regression (MGWR), Spatial Lag Model (SLM) and Spatial Error Model (SEM) after adjusting environmental, Socioeconomic maternal and child characteristics.

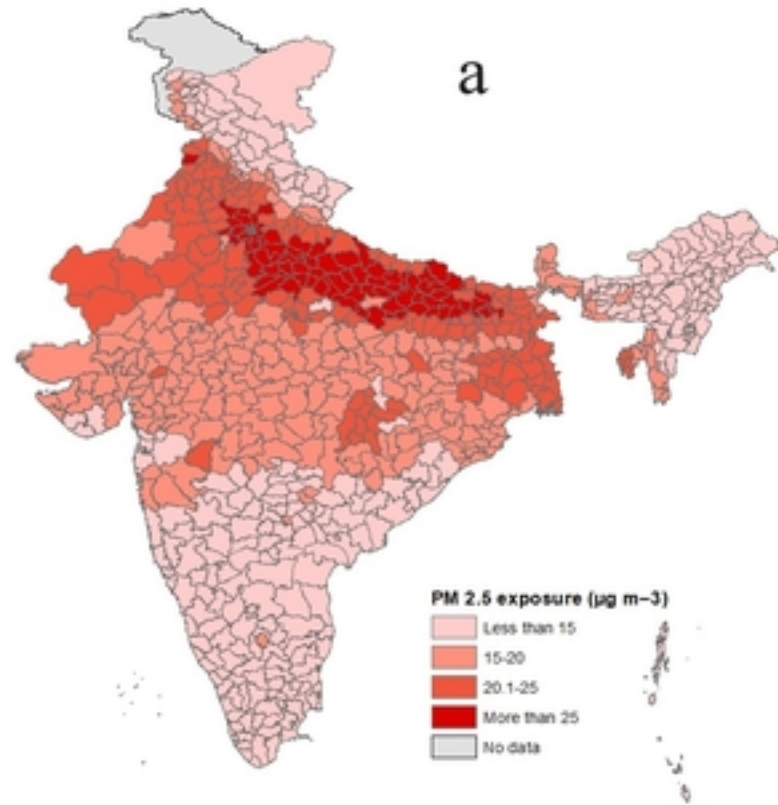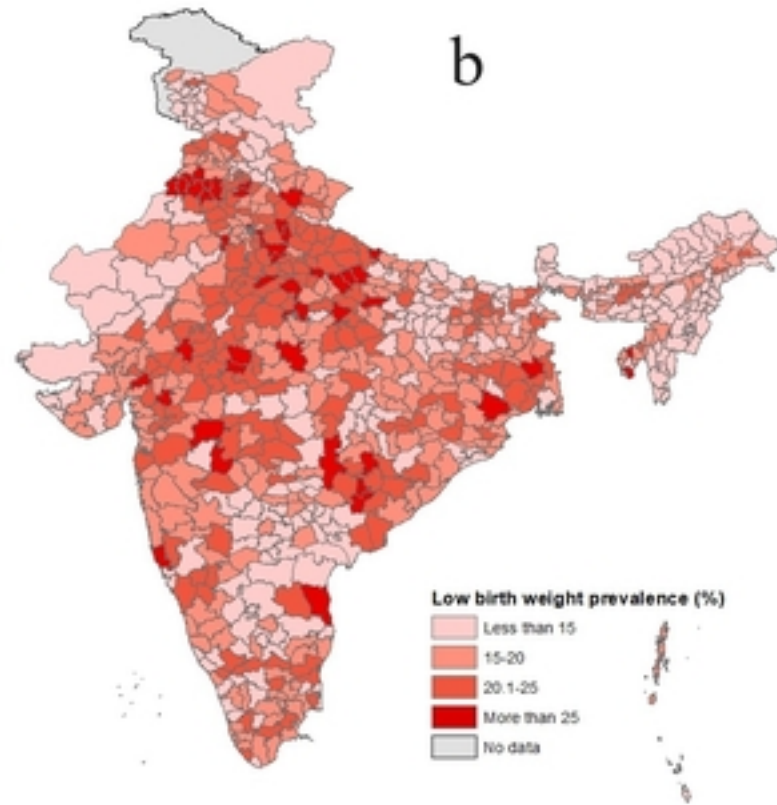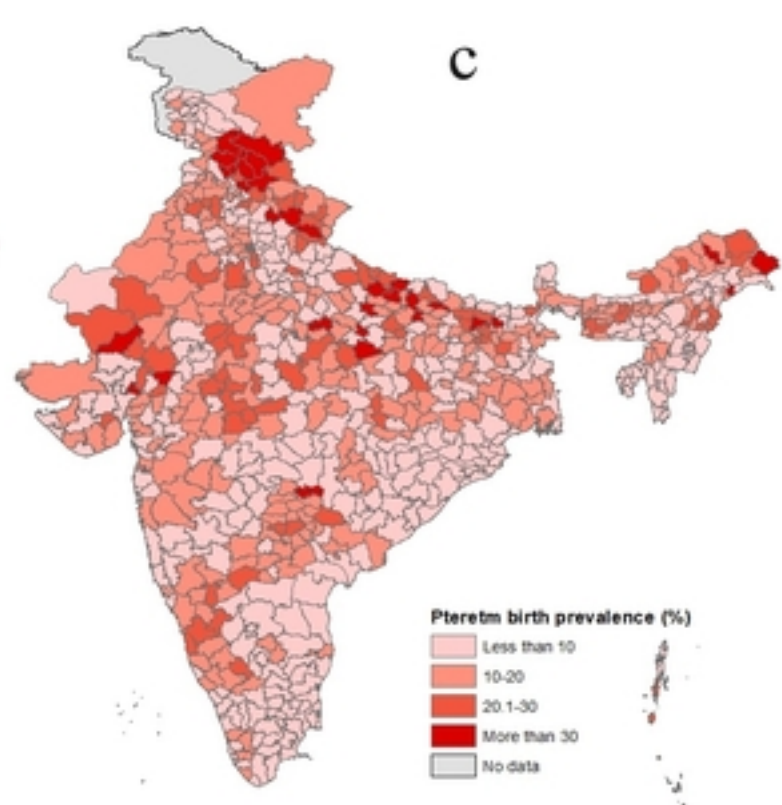

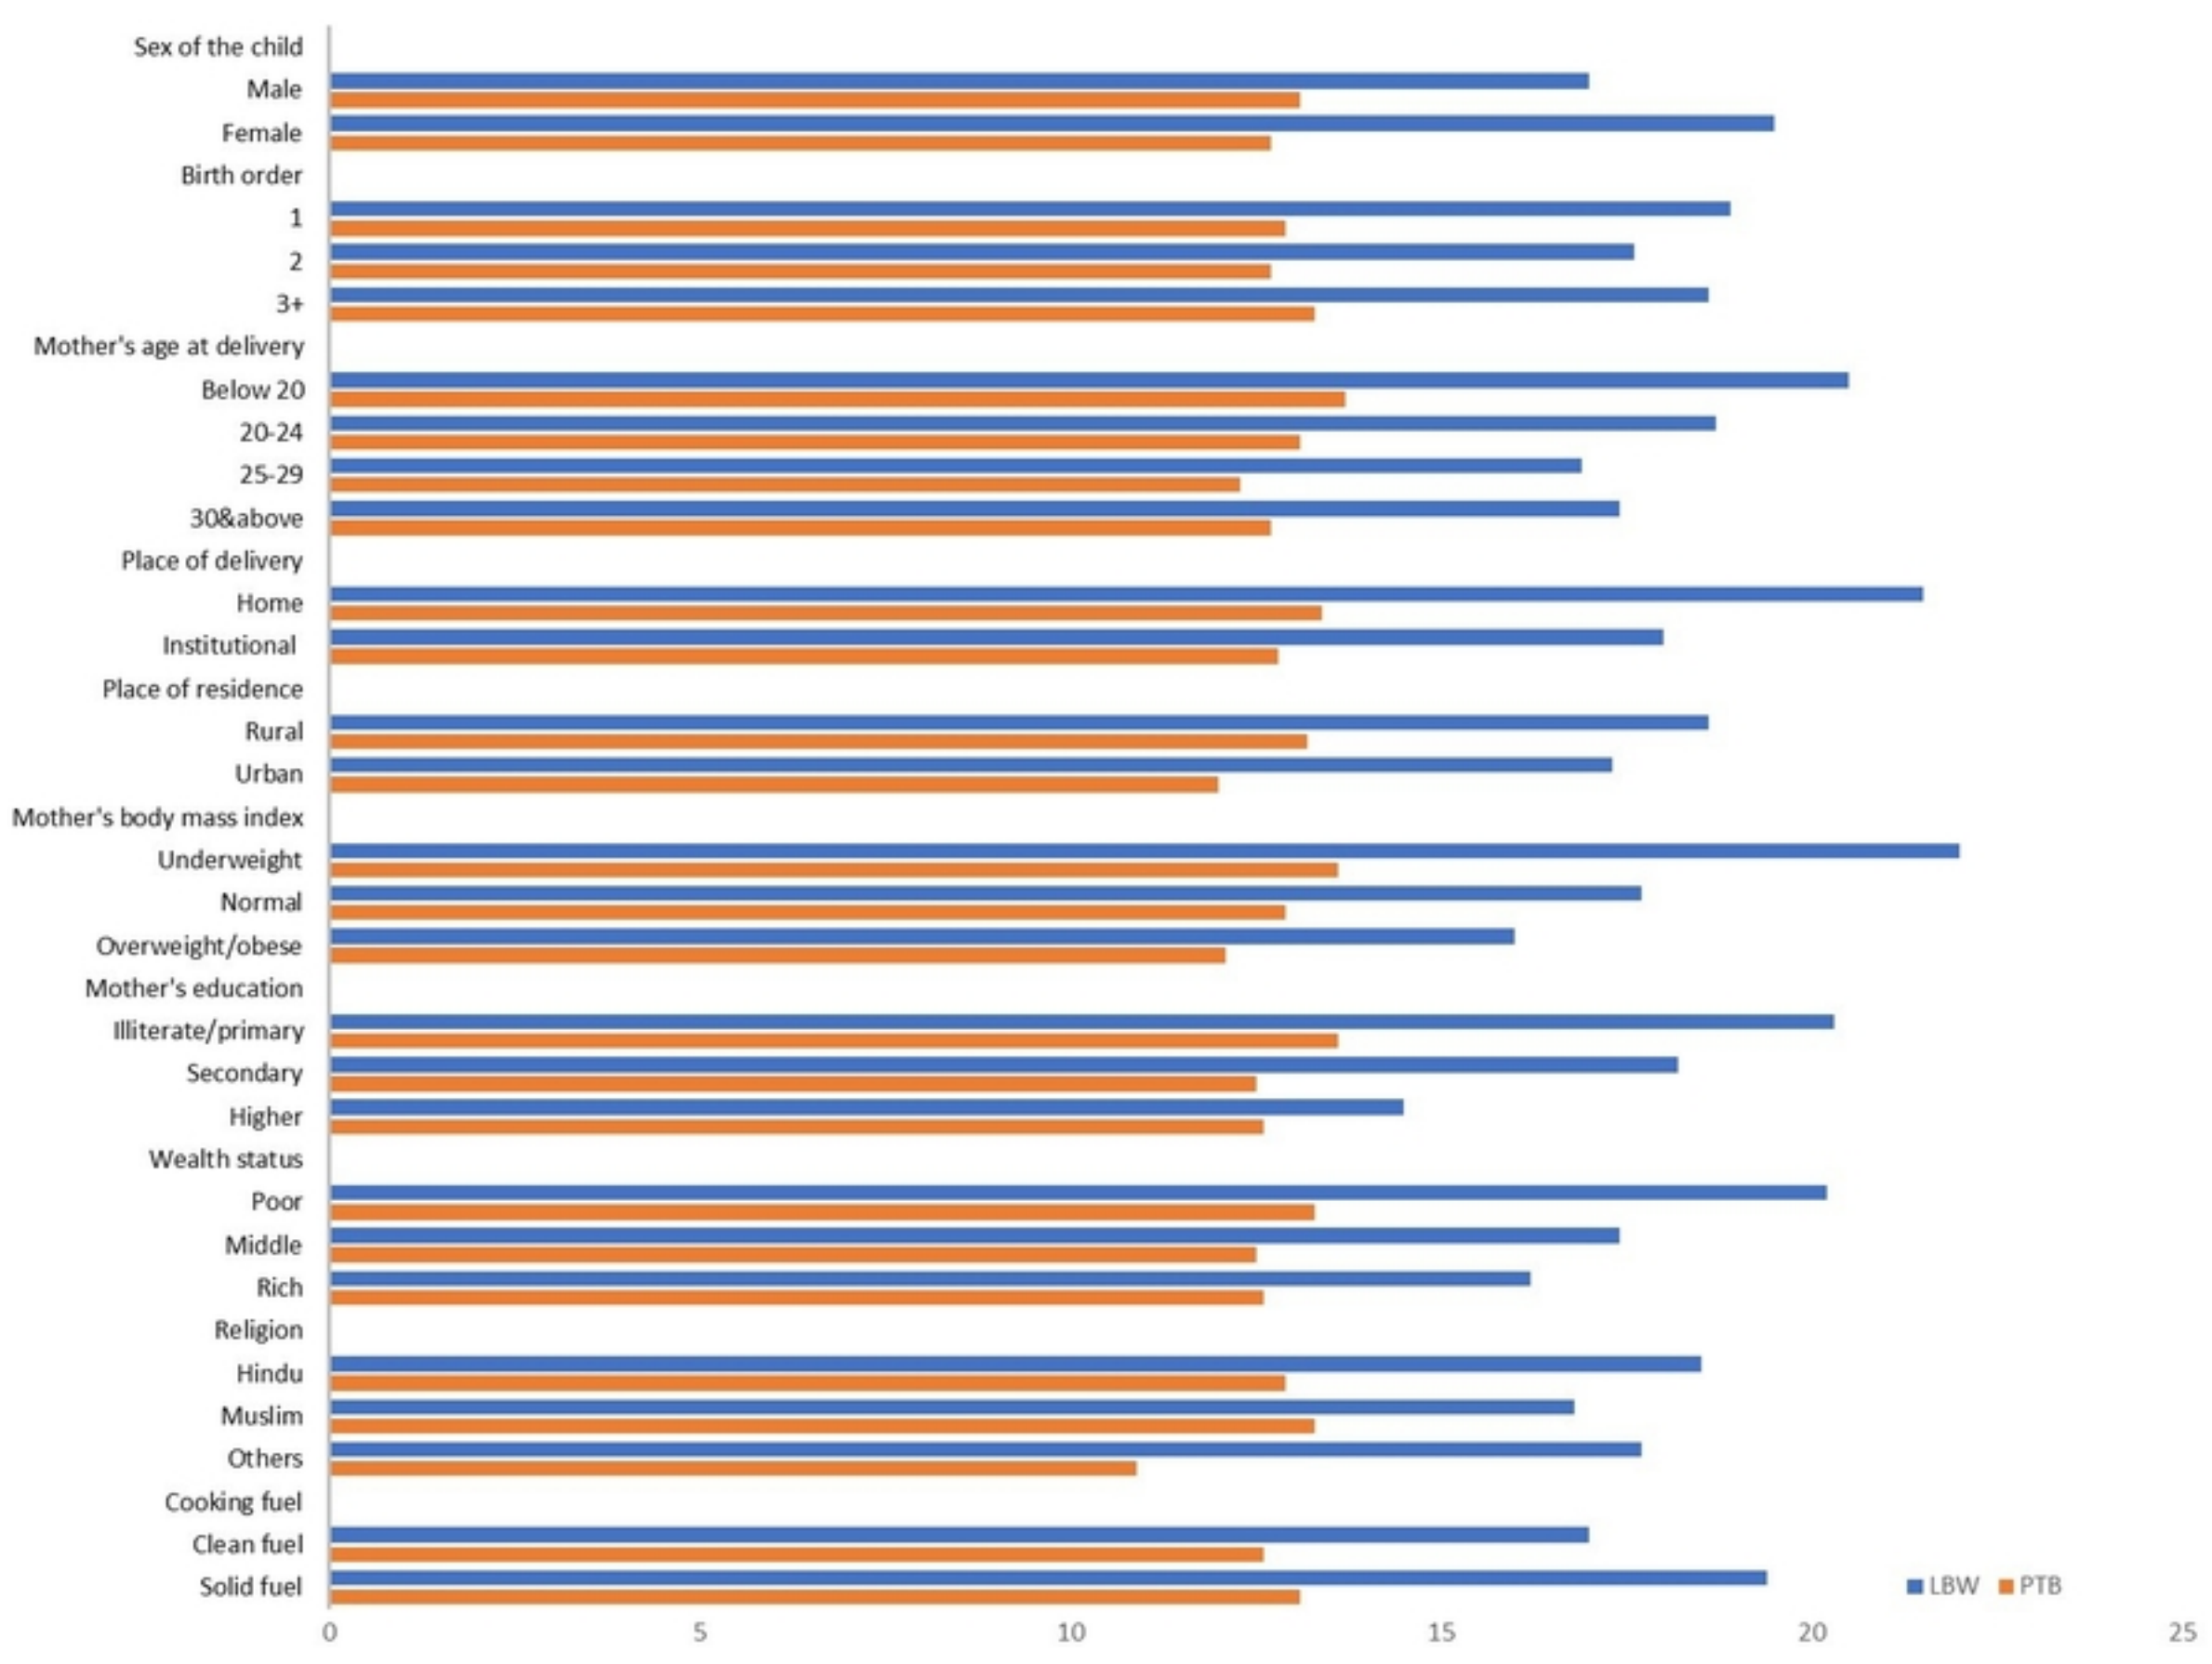

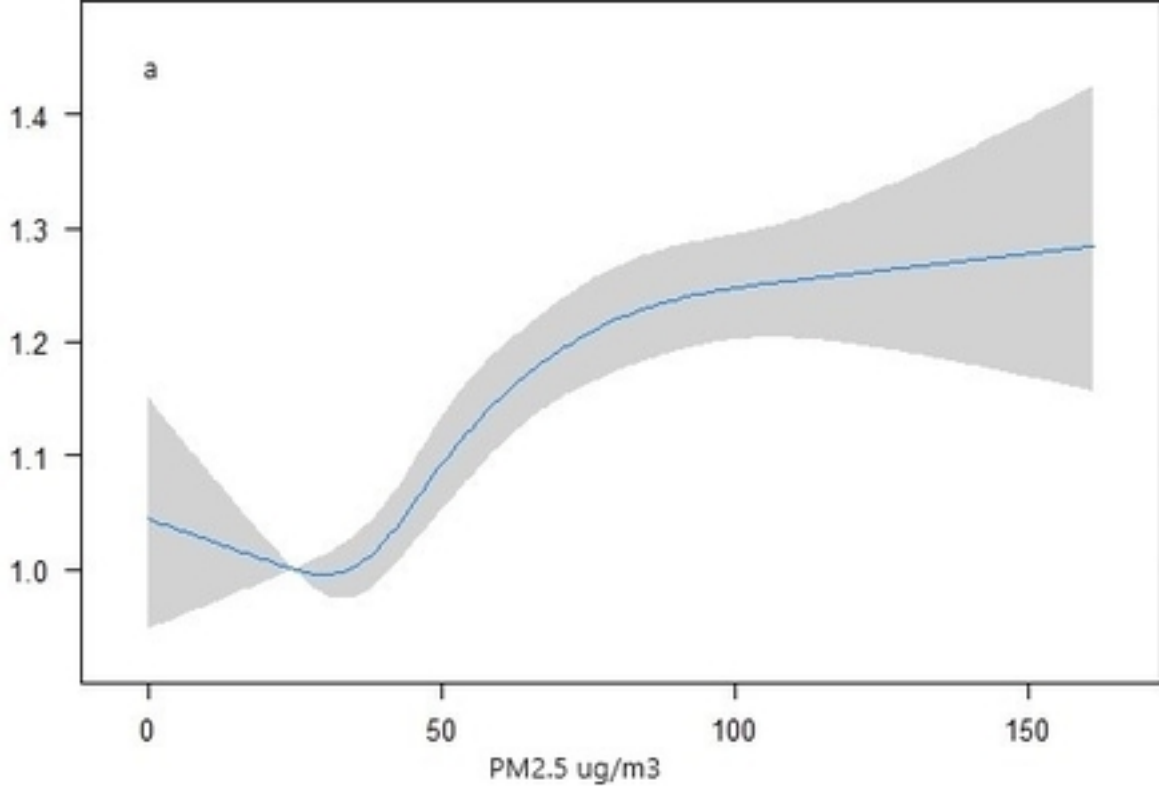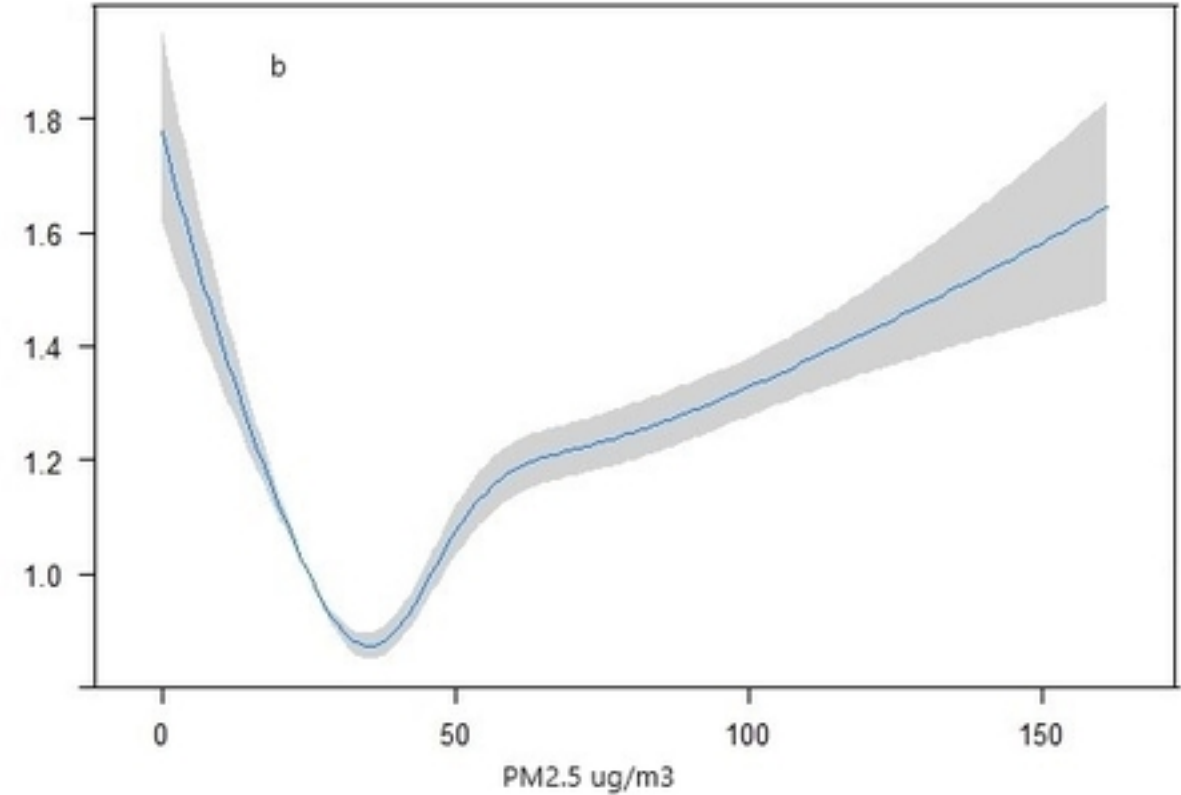

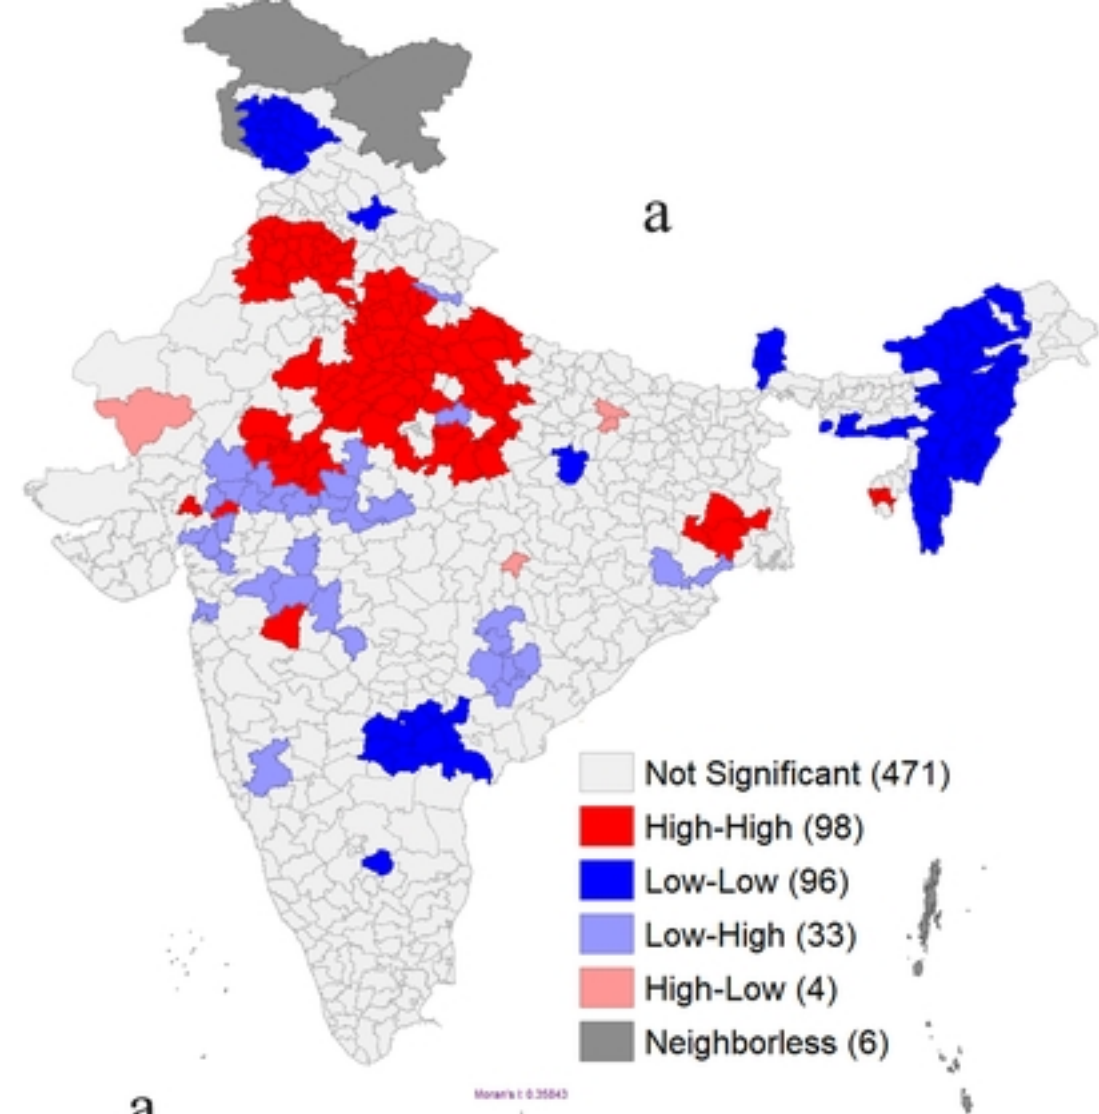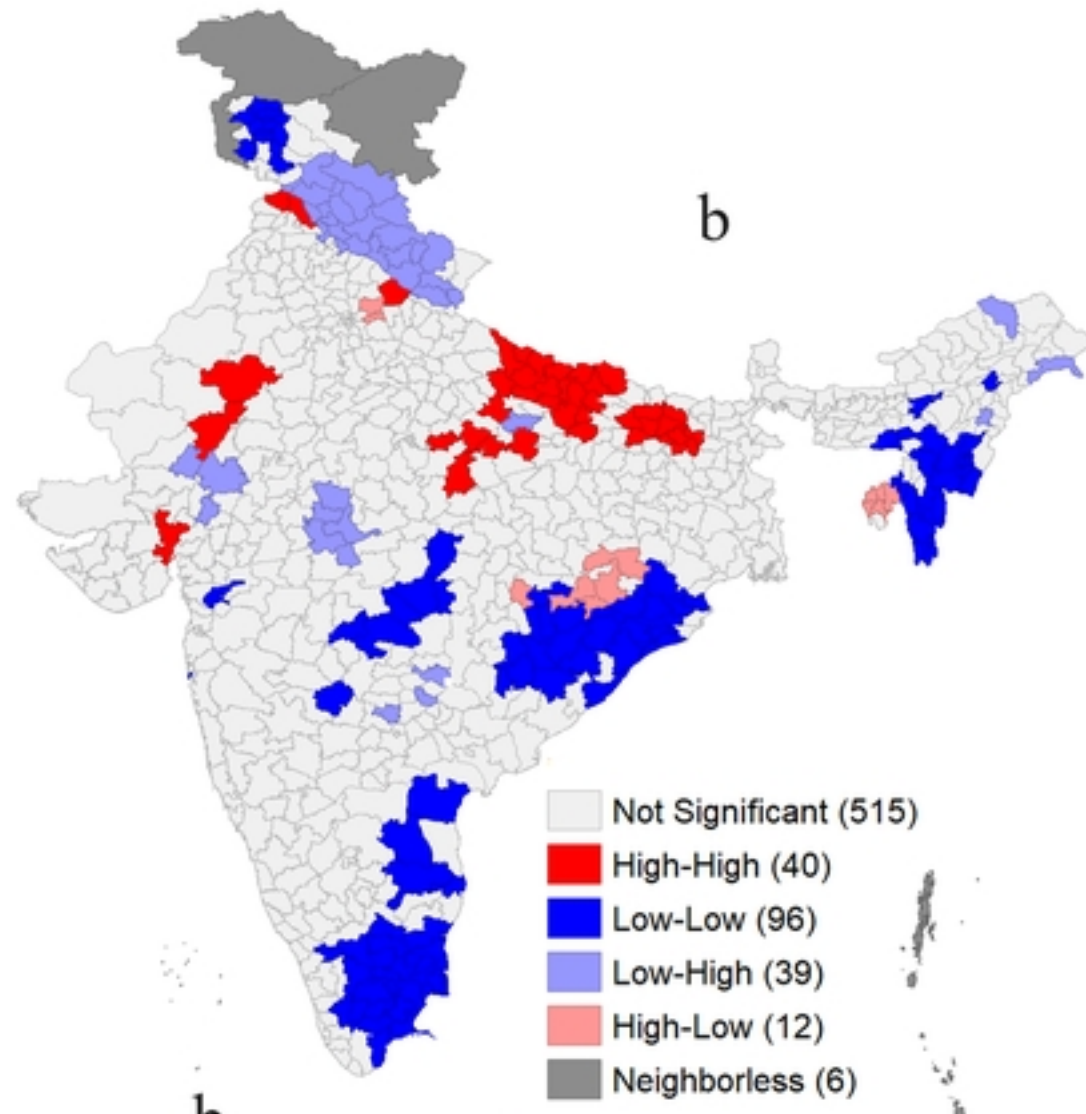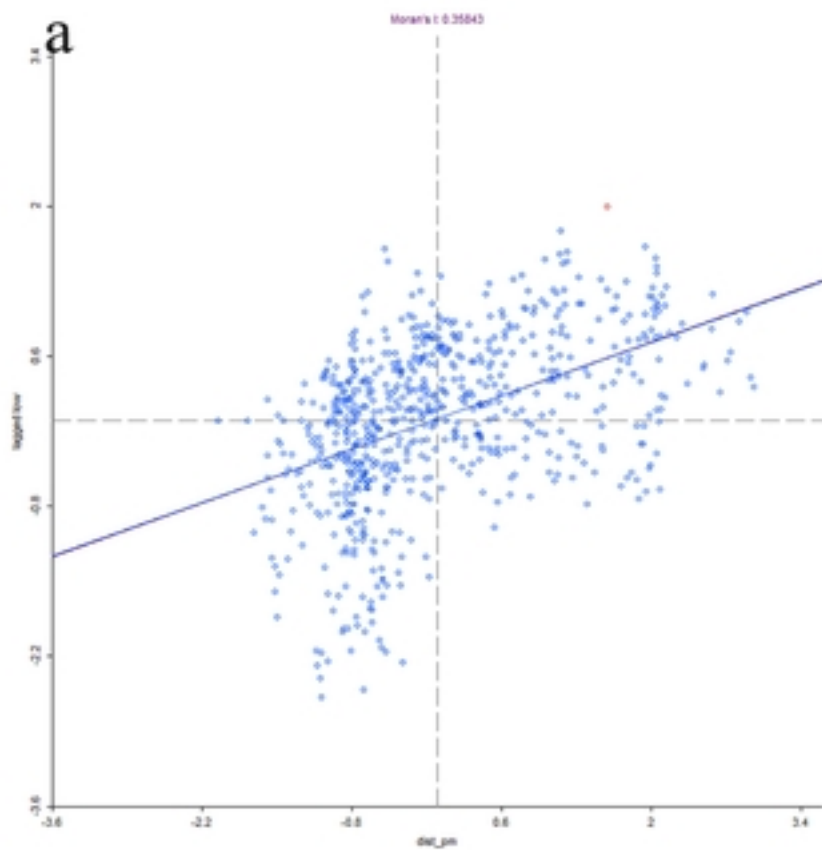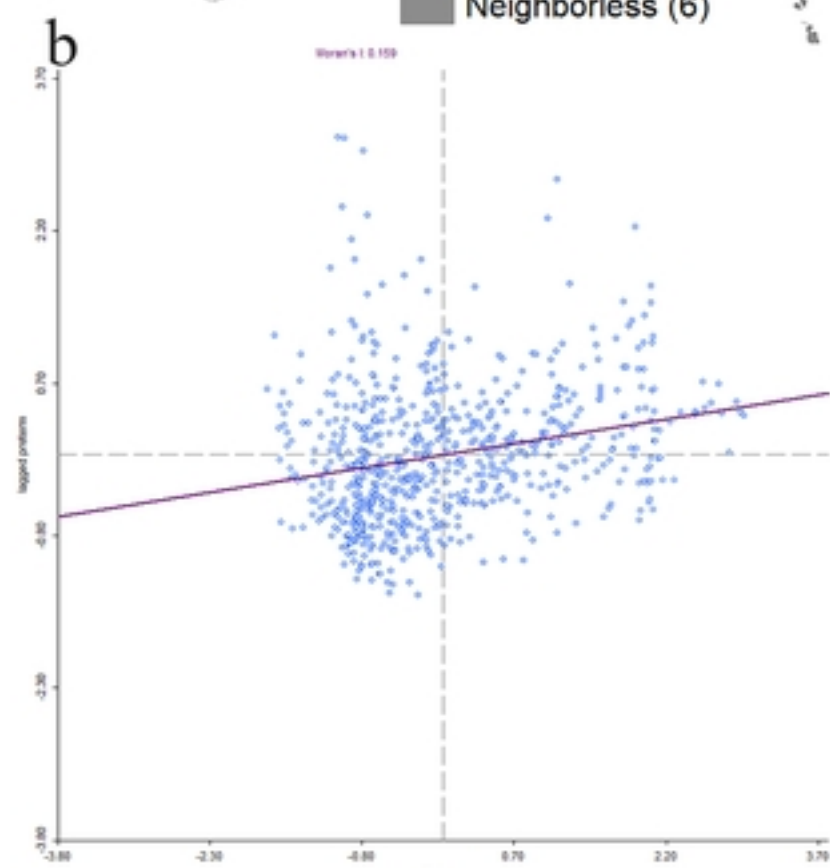



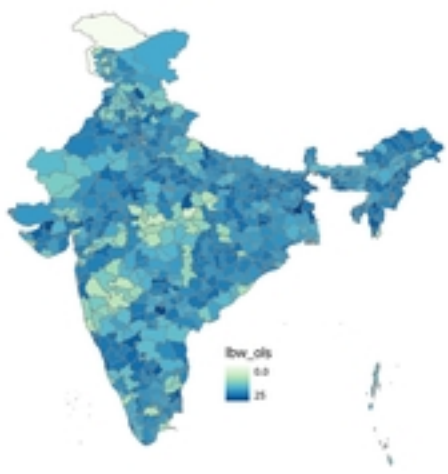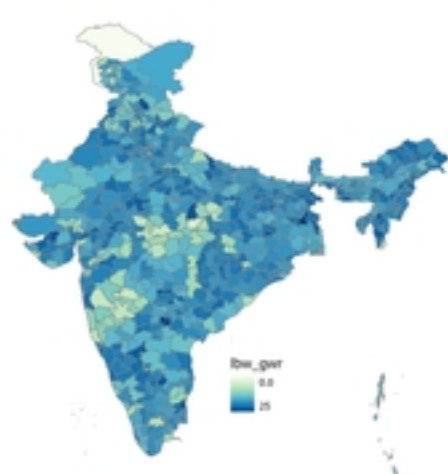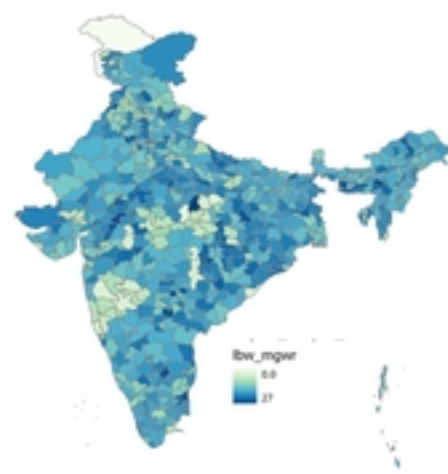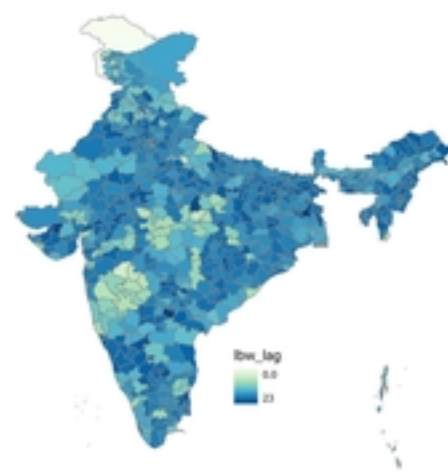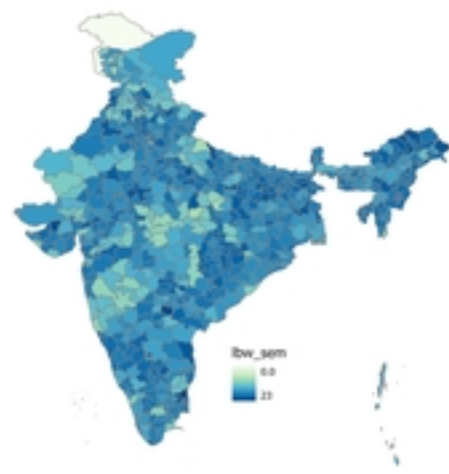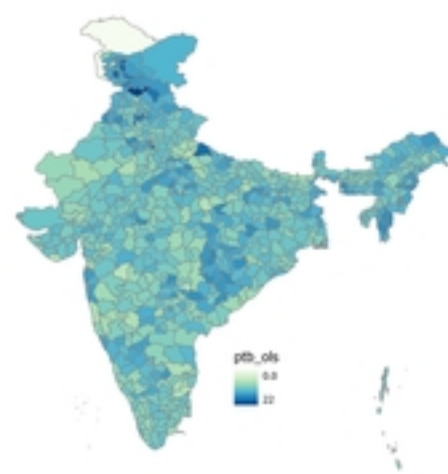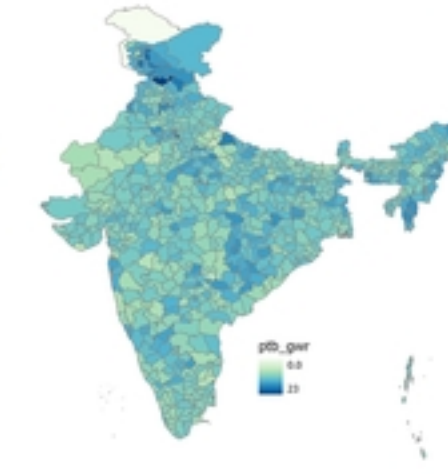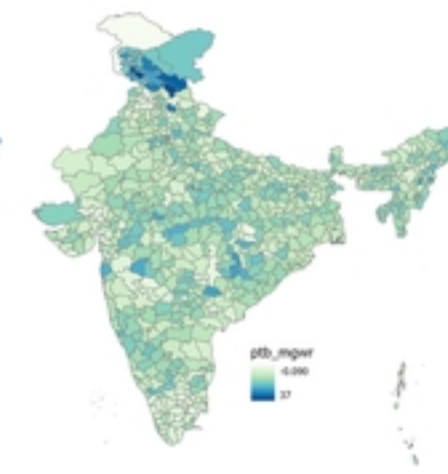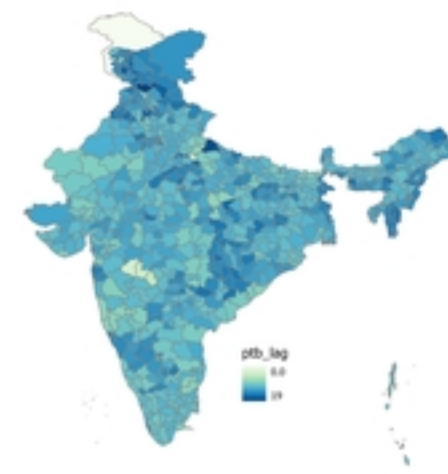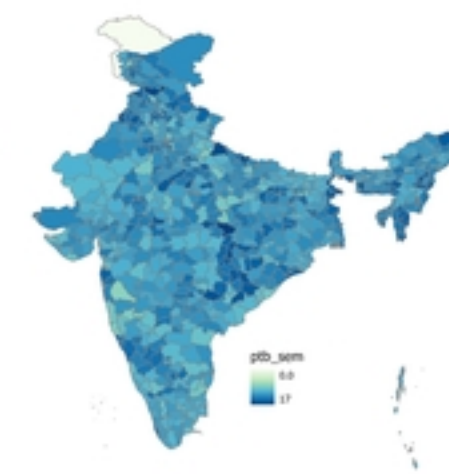

Source: https://medrxiv.org/content/10.1101/2024.09.16.24313773v1.full.pdf
